# Supplementary material for: New reticular chemistry of pillared rare-earthkgdsupermolecular building layer frameworks with ethane-trapping property
Source: Royal Society of Chemistry journal article supplement (doi:10.1039/d3qi00103b), 2023-01-01
Supplement: d3qi00103b1.pdf [file d3qi00103b1.pdf]

*Supporting Information*

**New reticular chemistry of pillared rare-earth kgd supermolecular  
building layer frameworks with ethane-trapping property**

Hong-Xin Li,<sup>a</sup> Han Fang,<sup>a</sup> Yu-Feng Zhang,<sup>a</sup> Zong-Hui Zhang,<sup>a</sup> and Dong-Xu Xue\*<sup>a</sup>

<sup>a</sup> *Key Laboratory of Applied Surface and Colloid Chemistry, Ministry of Education, Xi'an Key Laboratory of Organometallic Material Chemistry, School of Chemistry & Chemical Engineering, Shaanxi Normal University, Xi'an 710062, China.*

\*E-mail: xuedx@snnu.edu.cn

**Table of Contents**

|                                                                    |           |
|--------------------------------------------------------------------|-----------|
| <b>Section 1. Materials and General Procedures .....</b>           | <b>2</b>  |
| <b>Section 2. Additional Structural Figures .....</b>              | <b>6</b>  |
| <b>Section 3. Powder X-ray Diffraction (PXRD) patterns .....</b>   | <b>9</b>  |
| <b>Section 4. Thermal Gravimetric Analysis (TGA).....</b>          | <b>10</b> |
| <b>Section 5. Low-Pressure Gas Sorption Measurements .....</b>     | <b>11</b> |
| <b>Section 6. High-Pressure Methane Sorption Measurements.....</b> | <b>24</b> |
| <b>Section 7. Single Crystal X-ray Crystallography Data.....</b>   | <b>26</b> |
| <b>Section 8. References .....</b>                                 | <b>32</b> |

## Section 1. Materials and General Procedures

All reagents were obtained from commercial sources and used without further purification. PXRD measurements were performed on a Rigaku MiniFlex 600 diffractometer with Cu  $K\alpha$  ( $\lambda = 1.5406 \text{ \AA}$ ), and the X-ray tube was operated at 40 kV and 40 mA. High-resolution thermogravimetric analysis (TGA) was performed under a continuous  $N_2$  flow and recorded on a Q600SDT thermal analyzer with a heating rate of  $5 \text{ }^\circ\text{C}/\text{min}$ . Fourier transform infrared (FT-IR) spectrum ( $400\text{-}4000 \text{ cm}^{-1}$ , KBr pellet) was collected in the solid state on a Bruker Tensor 27 FT-IR spectrometer. Elemental analyses (C, H, N and S) were obtained from a Vario EL cube analyzer. Breakthrough system used in this work is the homemade HPMC41 gas separation test system (Nanjing Hope Analytical Equipment Co., Ltd).

### Synthesis of ligands

#### Synthesis of $H_3NTB$

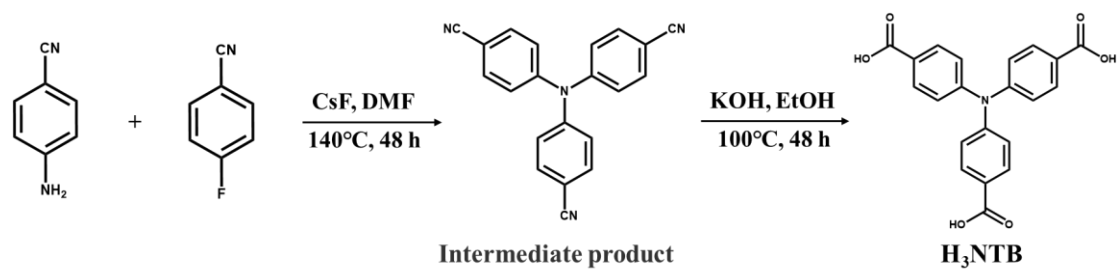

4,4',4''-nitritotribenzoic acid ( $H_3NTB$ ) was synthesized according to the previously reported literature.<sup>1</sup>

In the first step, 1.18 g (10 mmol) of 4-aminobenzonitrile was dissolved in 50 mL N,N-dimethylformamide (DMF). Then 6.04 g (40.0 mmol) of CsF was added slowly to the solution with continuous stirring followed by the addition of 2.66 g (22 mmol) of 4-fluorobenzonitrile. The total reaction mixture was then refluxed at  $140 \text{ }^\circ\text{C}$  for 48 h. After cooling, the reaction mixture was poured into ice cold water to precipitate out the intermediate product (4,4',4''-tricyanotriphenylamine). The precipitate was filtered and washed with plenty of water and finally dried in a hot air oven to yield 2.94 g (91%) of 4,4',4''-tricyanotriphenylamine.

In the second step, 2 g of 4,4',4''-tricyanotriphenylamine was dissolved in a mixture containing 20 mL ethanol and 60 mL 6M KOH solution. The mixture was then refluxed at  $100 \text{ }^\circ\text{C}$  for 48 h. After cooling down to room temperature the mixture was acidified with 3M HCl. The pH of the solution was adjusted to 3 to get a white precipitate. Finally the precipitate was filtered and washed with plenty of water, dried in an oven to obtain the  $H_3NTB$  product (2.1 g,  $\sim 90\%$ ). The finally product was used without further purification.  $^1\text{H NMR}$  (400 MHz,  $\text{DMSO-}d_6$ ):  $\delta = 7.91$  (d, 6H), 7.15 (dd, 6 H) ppm.

## Synthesis of H<sub>2</sub>DTTDC

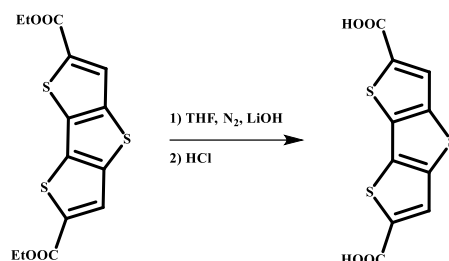

Dithieno[3,2-b:2',3'-d] thiophene-2,6-dicarboxylic acid diethyl ester (5.00 g, 14.7 mmol) was suspended in tetrahydrofuran (75 mL). An aqueous solution of 1 M lithium hydroxide (75 mL, 75 mmol, 5.1 equiv.) was added, causing the color of the suspension to change from yellow to terracotta. The mixture was heated to 70 °C and followed by stirring at this temperature for 4 h, and then afforded an orange solution. The solvent was evaporated on a rotary evaporator until the volume remaining was about 75 mL. A small amount of precipitate was observed. The solution was acidified with 1 M hydrochloric acid (100 mL) to give a white precipitate with some slight foam. The solid was filtered slowly under vacuum on a Büchner funnel and washed sequentially with water (200 mL), methanol (100 mL) and diethyl ether (100 mL). Finally, the solid was dried overnight in a high vacuum oven (40 °C, approx. 0.02 mmHg) to afford the crude diacid (H<sub>2</sub>DTTDC) (3.8 g, 91%). The ligand was used without further purification. <sup>1</sup>H NMR (400 MHz, DMSO-*d*<sub>6</sub>): δ: 8.18 ppm (s, 2 H).

## Synthesis of H<sub>2</sub>OBDC

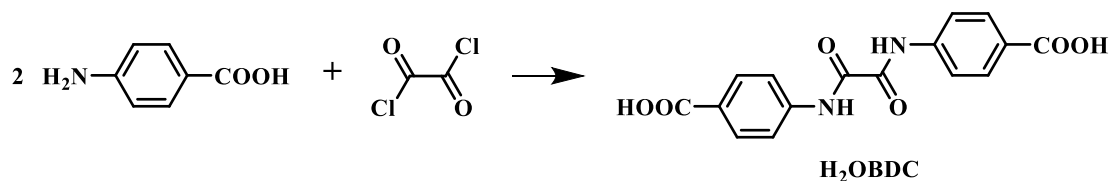

H<sub>2</sub>OBDC was synthesized according to the previously reported procedure with slight modification.<sup>2</sup> 4-aminobenzoic acid (1.28 g, 8.37 mmol) was dissolved in NMP (15 mL) and cooled to 5 °C in ice bath. Liquid oxalyl chloride (0.812 g, 4.00 mmol) was added drop wise over 1 h. The reaction mixture was stirred at 5 °C for 2 h followed by continue stirring at room temperature for an additional 12 h. After that, 20 mL of distilled water was added to the reaction. The product was filtered and washed with NMP (20 mL), distilled water (5 × 50 mL), methanol (2 × 20 mL). The product was then dried at 65 °C for 12 h to afford the H<sub>2</sub>OBDC linker as a light grey powder (1.10 g, 84%). <sup>1</sup>H NMR (400 MHz, DMSO-*d*<sub>6</sub>): δ = 11.09 (s, 2H), 7.74 (dd, 4H), 7.55 (dd, 4H) ppm.

## Synthesis of MOFs

### Synthesis of Tb-NTB-HNTB

A mixture of Tb(NO<sub>3</sub>)<sub>3</sub>·6H<sub>2</sub>O (19.7 mg, 0.0435 mmol), H<sub>2</sub>BPDC (5.3 mg, 0.02175 mmol), H<sub>3</sub>NTB (8.2 mg, 0.02175 mmol) and DMF (3.0 mL) and 2-FBA (FBA = 2-fluorobenzoic acid, 0.6 mL, 3.48 M/DMF) were combined in a 20 mL scintillation

---

vial, sealed and heated to 115 °C for 24 h. The colorless polyhedral crystals were collected, washed with DMF, and then air-dried. Yield  $\approx$  56.0% (based on H<sub>3</sub>NTB). Selected IR (KBr, cm<sup>-1</sup>): 3307 (br), 3070 (w), 2934 (w), 1664 (s), 1592 (vs), 1541 (m), 1405 (vs), 1278 (w), 1177 (s), 1101 (m), 1012 (w), 855 (m), 787 (s), 707 (m), 673 (m), 571 (w), 525 (w). Elem. Anal. (%) Calcd for C<sub>94</sub>H<sub>108</sub>F<sub>8</sub>N<sub>8</sub>O<sub>41</sub>Tb<sub>6</sub>: C, 36.29; H, 3.50; N, 3.60. Found: C, 36.29; H, 3.83; N, 3.86.

#### Synthesis of Tb-NTB-BDC

A mixture of Tb(NO<sub>3</sub>)<sub>3</sub>·6H<sub>2</sub>O (19.7 mg, 0.0435 mmol), H<sub>2</sub>BDC (8.3 mg, 0.05 mmol), H<sub>3</sub>NTB (7.5 mg, 0.02 mmol), DMF (3.0 mL), 2-FBA (FBA = 2-fluorobenzoic acid, 0.6 mL, 3.48 M/DMF), acetic acid (100  $\mu$ L) and n-pentanol (0.5 mL) were combined in a 20 mL scintillation vial, sealed and heated to 115 °C for 24 h. The colorless hexagonal prism crystals were collected, washed with DMF, and then air-dried. Yield  $\approx$  79.0% (based on H<sub>3</sub>NTB). Selected IR (KBr, cm<sup>-1</sup>): 3383 (br), 3070 (w), 2934 (w), 1660 (s), 1596 (vs), 1507 (w), 1402 (vs), 1312 (m), 1273 (w), 1177 (m), 1101 (m), 1016 (m), 859 (w), 787 (m), 753 (m), 711 (w), 669 (m), 571 (w), 521 (m), 444 (m). Elem. Anal. (%) Calcd for C<sub>85</sub>H<sub>117</sub>F<sub>8</sub>N<sub>9</sub>O<sub>44</sub>Tb<sub>6</sub>: C, 33.21; H, 3.84; N, 4.10. Found: C, 33.13; H, 4.45; N, 4.52.

#### Synthesis of Tb-NTB-1,4-NDC

A mixture of Tb(NO<sub>3</sub>)<sub>3</sub>·6H<sub>2</sub>O (19.7 mg, 0.087 mmol), 1,4-H<sub>2</sub>NDC (10.8 mg, 0.05 mmol), H<sub>3</sub>NTB (7.5 mg, 0.02 mmol), DMF (3.0 mL) and 2-FBA (FBA = 2-fluorobenzoic acid, 0.5 mL, 3.48 M/DMF), acetic acid (100  $\mu$ L) and n-pentanol (0.5 mL) were combined in a 20 mL scintillation vial, sealed and heated to 115 °C for 24 h. The colorless hexagonal prism crystals were collected, washed with DMF, and then air-dried. Yield  $\approx$  69.0% (based on H<sub>3</sub>NTB). Selected IR (KBr, cm<sup>-1</sup>): 3374 (br), 3069 (w), 2934 (w), 1664 (s), 1592 (vs), 1550 (w), 1397 (vs), 1317 (m), 1266 (m), 1177 (m), 1101 (m), 864 (m), 826 (m), 792 (s), 711 (w), 665 (w), 626 (w), 550 (m), 441 (w). Elem. Anal. (%) Calcd for C<sub>100</sub>H<sub>172</sub>F<sub>8</sub>N<sub>10</sub>O<sub>66</sub>Tb<sub>6</sub>: C, 32.69; H, 4.66; N, 3.81. Found: C, 32.42; H, 4.72; N, 4.02.

#### Synthesis of Tb-NTB-DTTDC

A mixture of Tb(NO<sub>3</sub>)<sub>3</sub>·6H<sub>2</sub>O (19.7 mg, 0.0435 mmol), H<sub>2</sub>DTTDC (6.2 mg, 0.02175 mmol), H<sub>3</sub>NTB (8.2 mg, 0.02175 mmol), DMA (3.0 mL) and 2-FBA (FBA = 2-fluorobenzoic acid, 0.6 mL, 3.48 M/DMF) were combined in a 20 mL scintillation vial, sealed and heated to 115 °C for 24 h. The colorless hexagonal prism crystals were collected, washed with DMF, and then air-dried. Yield  $\approx$  54.0% (based on H<sub>3</sub>NTB). Selected IR (KBr, cm<sup>-1</sup>): 3199 (br), 3089 (w), 2938 (w), 1660 (vs), 1596 (s), 1554 (m), 1504 (s), 1403 (vs), 1318 (w), 1273 (w), 1171 (m), 1099 (m), 1013 (w), 862 (m), 782 (s), 671 (m), 5789 (m), 520 (w), 443 (w). Elem. Anal. (%) Calcd for C<sub>88</sub>H<sub>106</sub>F<sub>8</sub>N<sub>8</sub>O<sub>44</sub>S<sub>9</sub>Tb<sub>6</sub>: C, 31.33; H, 3.17; N, 3.32, S, 8.55. Found: C, 31.62; H, 3.54; N, 2.90; S, 8.19.

#### Synthesis of Tb-NTB-OBDC

A mixture of Tb(NO<sub>3</sub>)<sub>3</sub>·6H<sub>2</sub>O (19.4 mg, 0.0435 mmol), H<sub>2</sub>OBDC (6.7 mg, 0.05

mmol), H<sub>3</sub>NTB (7.5 mg, 0.02 mmol), DMF (3.0 mL), 2-FBA (FBA = 2-fluorobenzoic acid, 0.6 mL, 3.48 M/DMF) and acetic acid (100  $\mu$ L) were combined in a 20 mL scintillation vial, sealed and heated to 115  $^{\circ}$ C for 12 h. The colorless hexagonal prism crystals were collected, washed with DMF, and then air-dried. Yield  $\approx$  65.0% (based on H<sub>3</sub>NTB). Selected IR (KBr,  $\text{cm}^{-1}$ ): 3594(br), 3239(br), 2930(w), 1664(s), 1596(s), 1495(m), 1402(vs), 1312(m), 1281(w), 1173(w), 1096(m), 982(w), 830(w), 787(s), 732(w), 707(m), 669(m), 571(m), 529(w), 449(w). Elem. Anal. (%) Calcd for C<sub>112</sub>H<sub>144</sub>F<sub>8</sub>N<sub>16</sub>O<sub>52</sub>Tb<sub>6</sub>: C, 36.76; H, 4.05; N, 6.34. Found: C, 36.92; H, 4.30; N, 6.61.

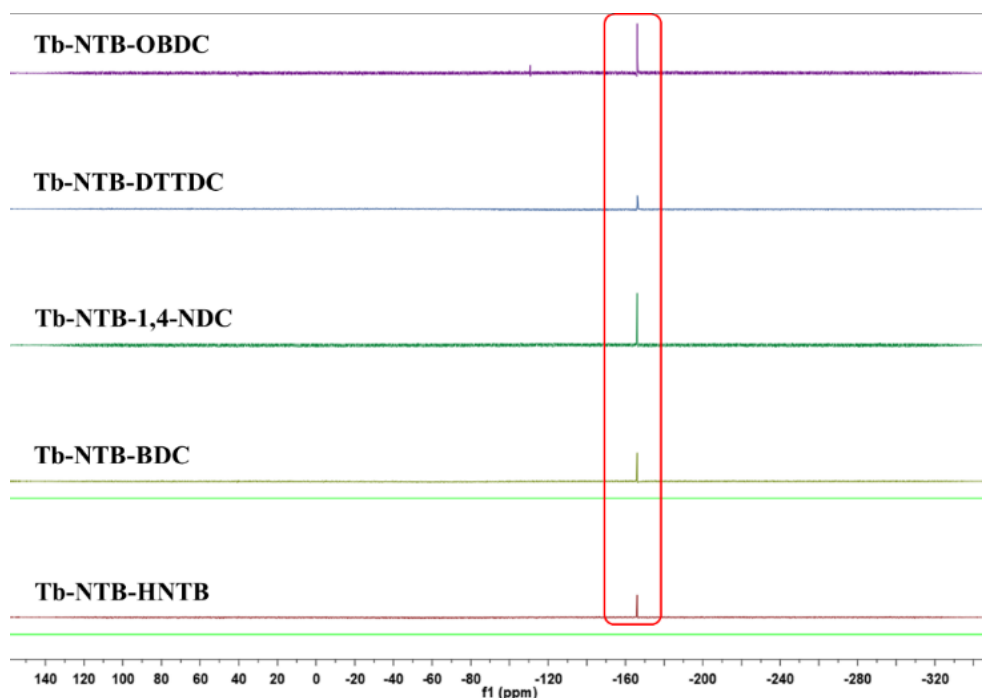

**Fig. S1** The <sup>19</sup>F NMR (400 MHz, DMSO-*d*<sub>6</sub>) spectra of Tb-NTB-HNTB, Tb-NTB-BDC, Tb-NTB-1,4-NDC, Tb-NTB-DTTDC and Tb-NTB-OBDC. For all materials, there is a peak at  $\delta = -166$  ppm, this signal is attributed to HF, from the dissolved materials in H<sub>2</sub>SO<sub>4</sub> and DMSO-*d*<sub>6</sub>.

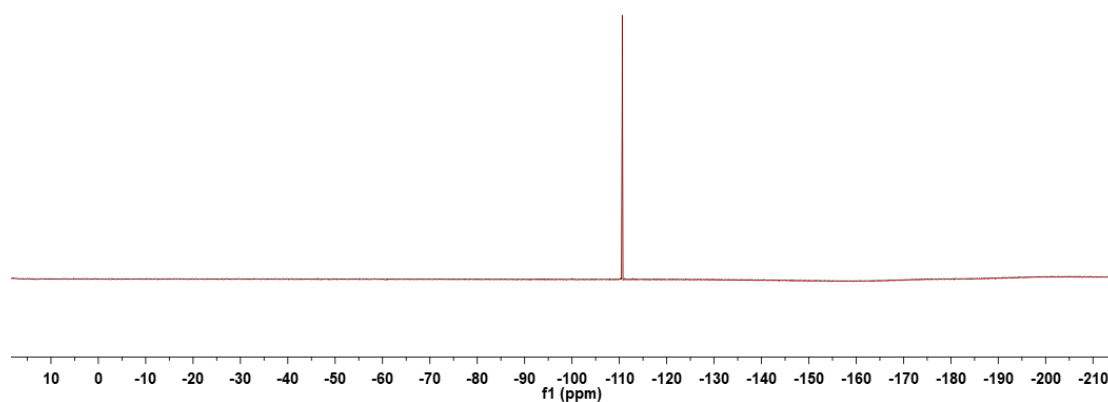

**Fig. S2** The <sup>19</sup>F NMR (400 MHz, DMSO-*d*<sub>6</sub>) spectra of 2-fluorobenzoic acid, it has a peak at  $\delta = -110$  ppm.

## Section 2. Additional Structural Figures

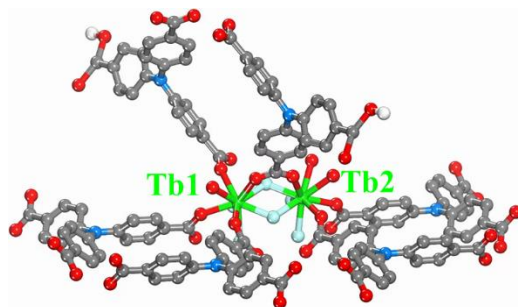

**Fig. S3** The coordination environment of the rare earth metal ions in Tb-NTB-HNTB.

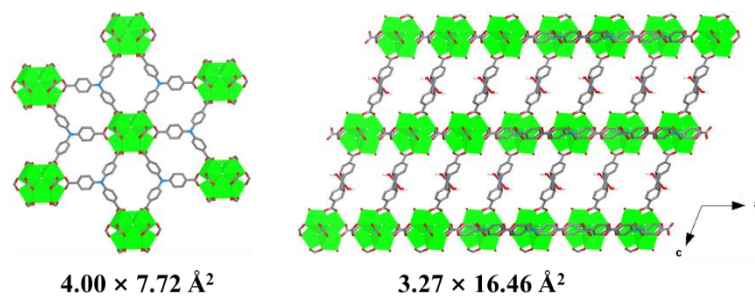

**Fig. S4** Channels in Tb-NTB-HNTB along different directions with their sizes.

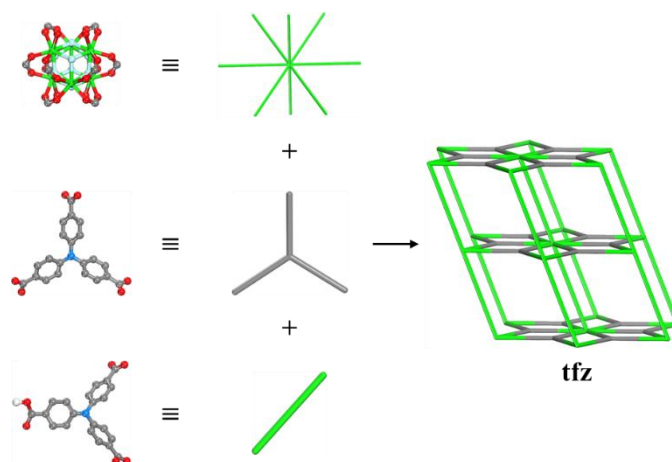

**Fig. S5** Topology analysis of Tb-NTB-HNTB based on the node-linker strategy.

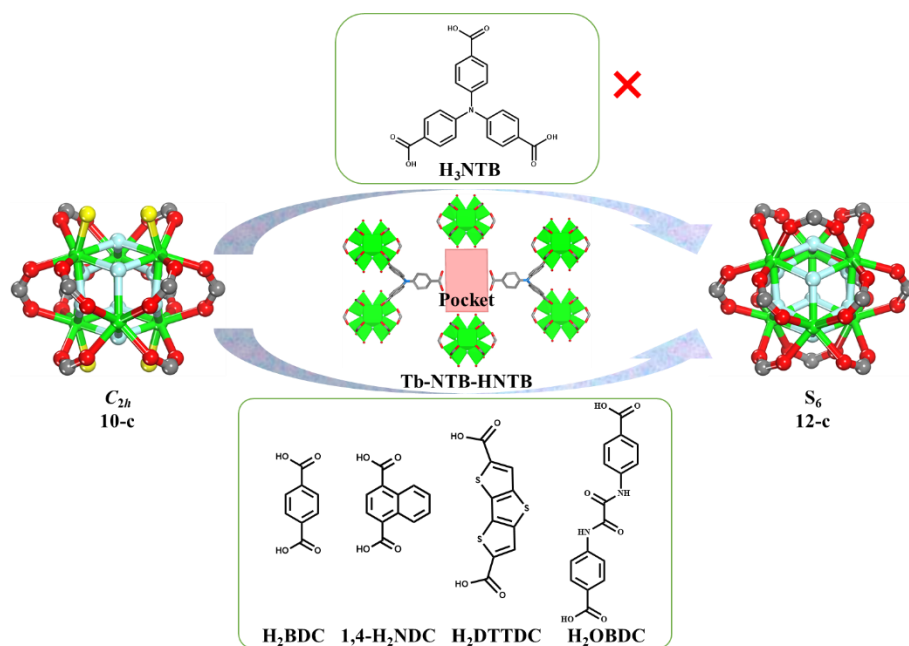

**Fig. S6** Schematic representation of HNTB pillar in Tb-NTB-HNTB replaced by different ditopic ligands.

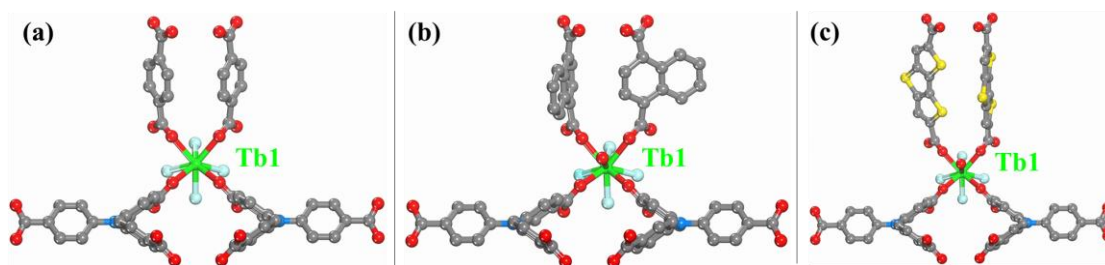

**Fig. S7** The coordination environments of the rare earth metal ions in (a) Tb-NTB-BDC, (b) Tb-NTB-1,4-NDC and (c) Tb-NTB-DTTDC.

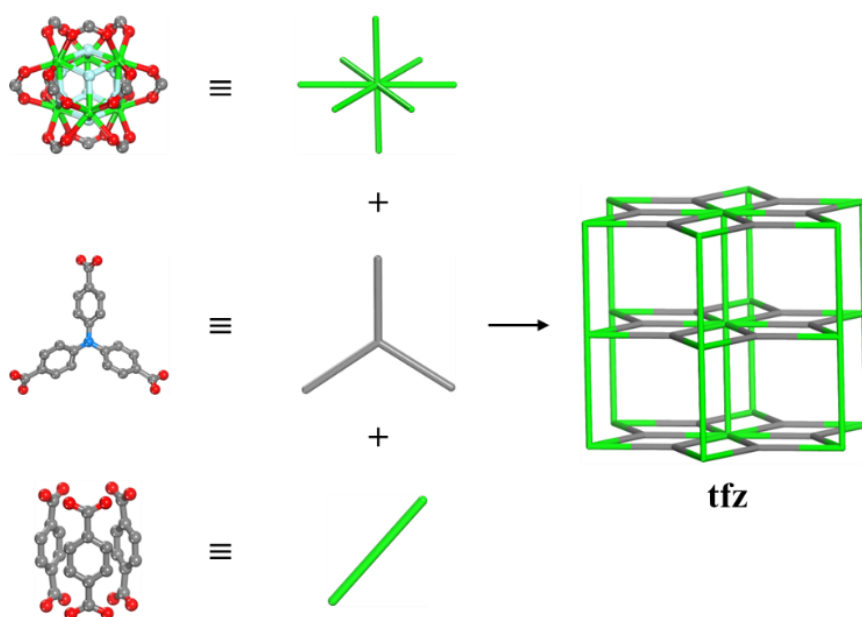

**Fig. S8** Topology analysis of Tb-NTB-BDC based on the node-linker strategy.

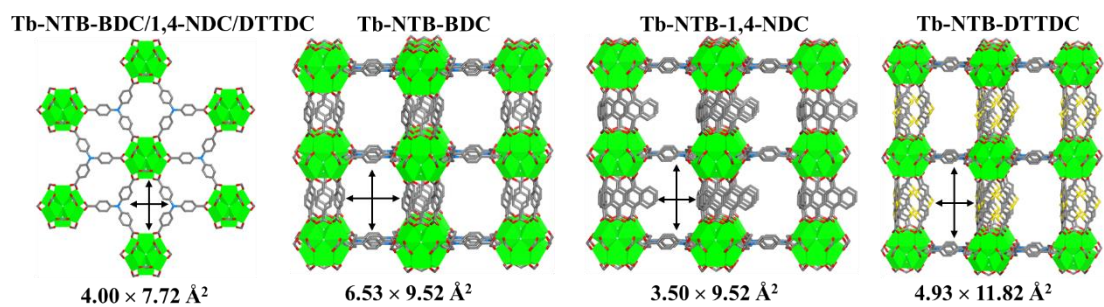

**Fig. S9** One-dimensional channels with their sizes in Tb-NTB-BDC, Tb-NTB-1,4-NDC and Tb-NTB-DTTDC.

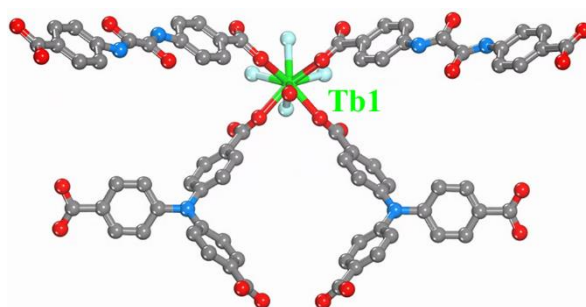

**Fig. S10** The coordination environment of the rare earth metal ion in Tb-NTB-OBDC.

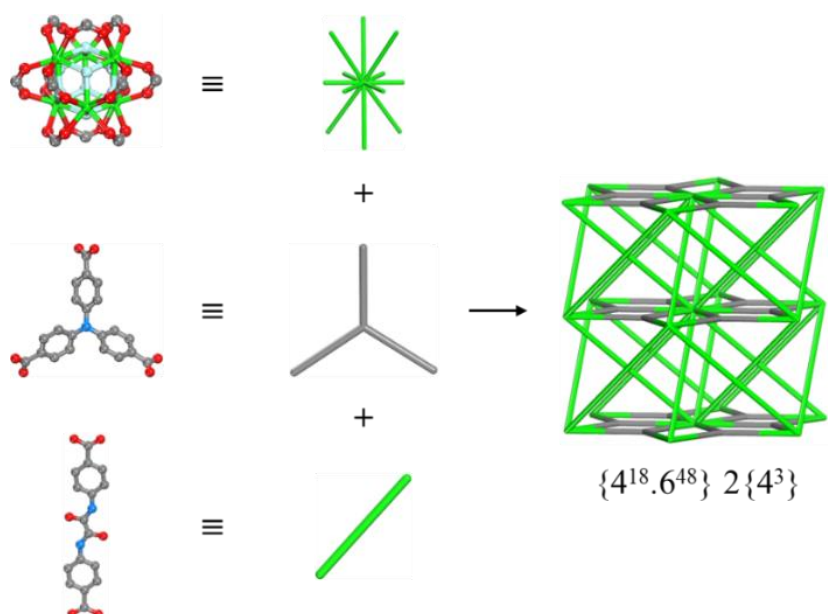

**Fig. S11** Topology analysis of Tb-NTB-OBDC based on the node-linker strategy.



### Section 3. Powder X-ray Diffraction (PXRD) patterns

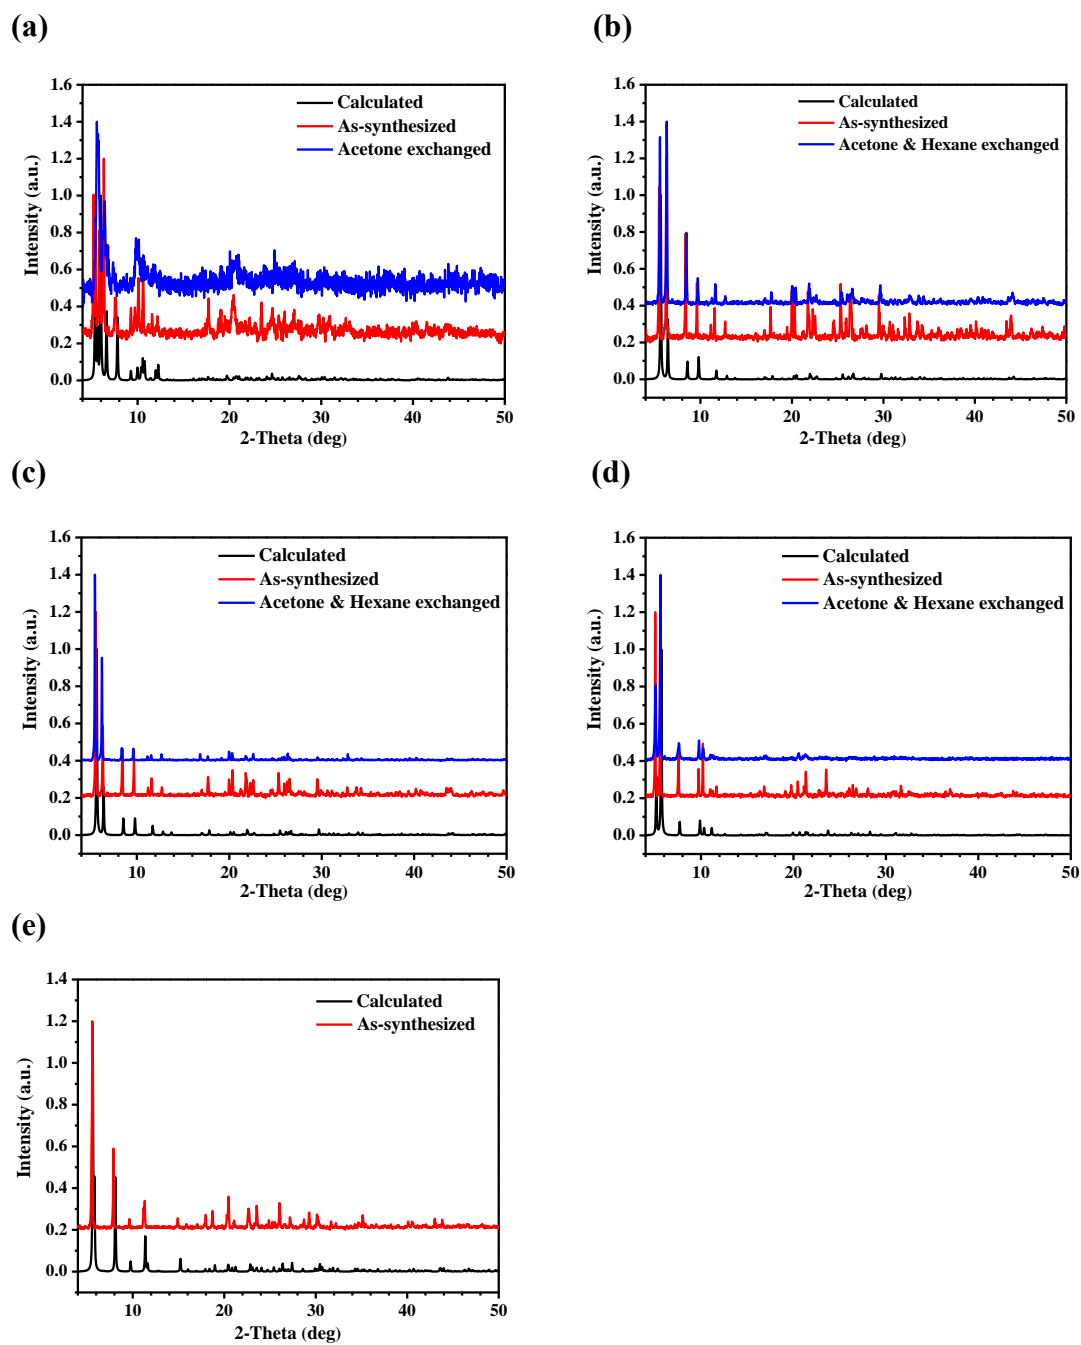

**Fig. S12** Powder X-ray diffraction patterns of (a) Tb-NTB-HNTB, (b) Tb-NTB-BDC, (c) Tb-NTB-1,4-NDC, (d) Tb-NTB-DTTDC and (e) Tb-NTB-OBDC.

## Section 4. Thermal Gravimetric Analysis (TGA)

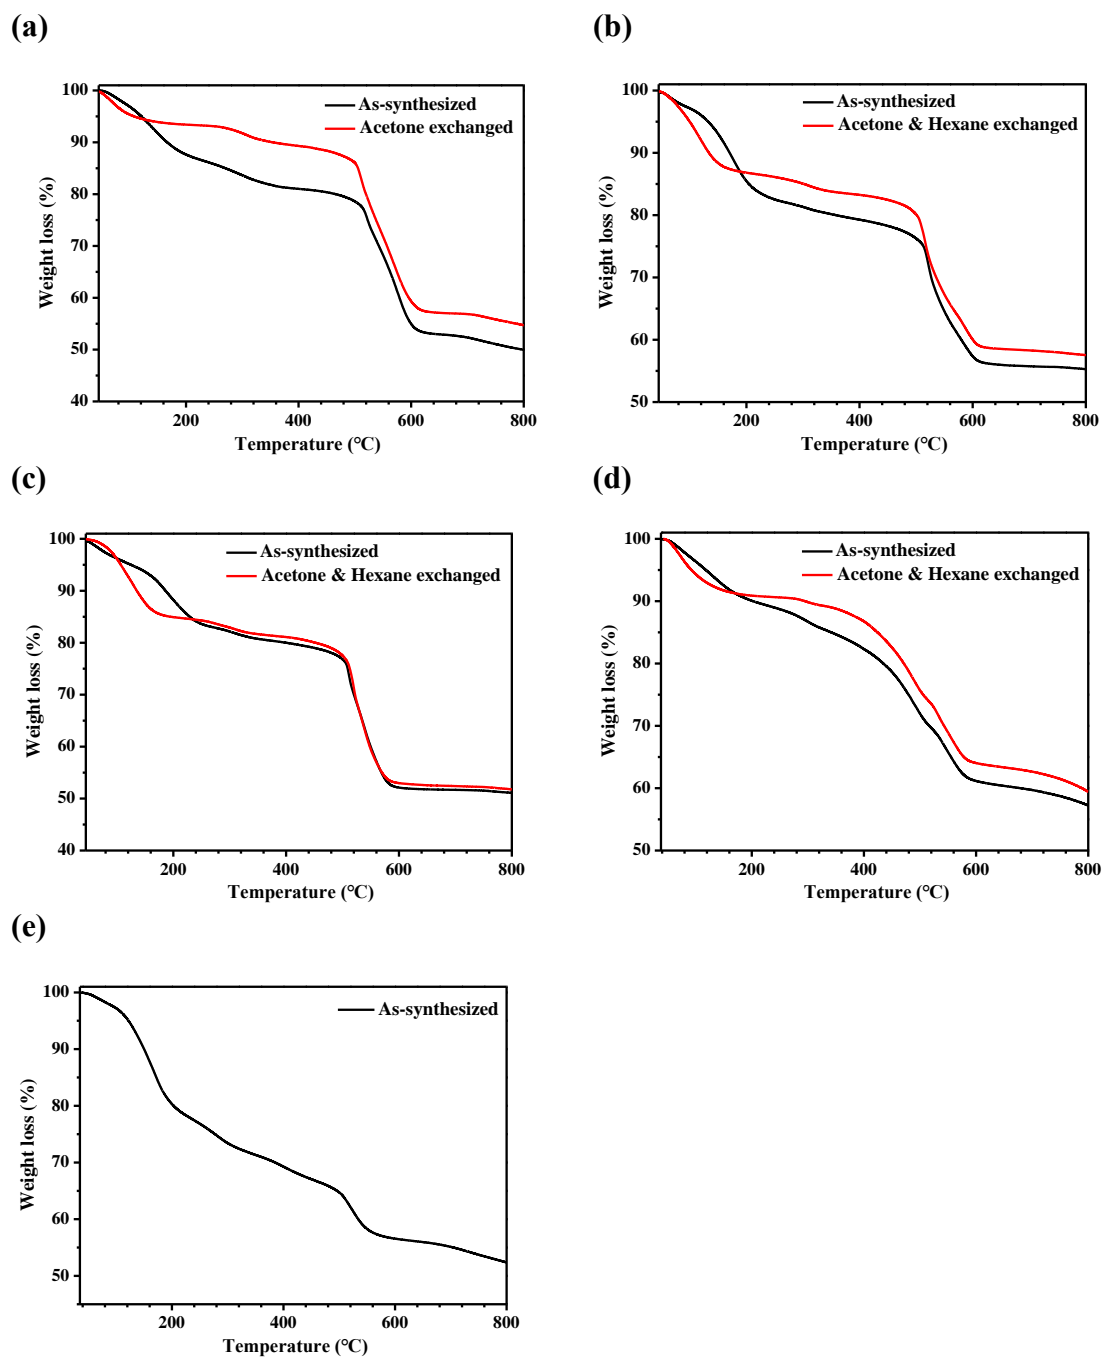

**Fig. S13** TGA plots of (a) Tb-NTB-HNTB, (b) Tb-NTB-BDC, (c) Tb-NTB-1,4-NDC, (d) Tb-NTB-DTTDC and (e) Tb-NTB-OBDC.

---

## Section 5. Low-Pressure Gas Sorption Measurements

Low pressure gas sorption studies were conducted on a fully automated micropore gas analyzer Autosorb-iQ3 (Quantachrome Instruments) at relative pressures up to 1 atm. The cryogenic temperature was controlled using liquid nitrogen at 77 K. The bath temperature for the C<sub>2</sub>H<sub>6</sub>, C<sub>2</sub>H<sub>4</sub>, C<sub>2</sub>H<sub>2</sub> and CO<sub>2</sub> sorption measurements was controlled using a recirculating bath containing an ethylene glycol/H<sub>2</sub>O mixture. The apparent surface areas were determined from the nitrogen adsorption isotherms collected at 77 K by applying the BET models. Pore size analyses were performed using a cylindrical/spherical NLDFT pore model system by assuming an oxidic (zeolitic) surface.

### The calculation methods of adsorption enthalpy:

(1) The isosteric enthalpy of adsorption,  $Q_{st}$  was determined by fitting the adsorption isotherms at 273 and 298 K to the Single-site Langmuir equation (Eqn 1);

$$n = \frac{n_L b p}{1 + b p} \quad (1)$$

Where  $n$  is the amount of gas adsorbed in mmol/g,  $P$  is the pressure in Pa,  $n_L$  is the saturation capacity in mmol/g, and  $b$  is the Langmuir parameter of adsorption site.

Using the Single-site Langmuir equation fit, the isosteric heat of adsorption can be calculated for the material as a function of the total amount of gas adsorbed using the Clausius-Clapeyron equation (Eqn 2).

$$\frac{d \ln p}{dT} = \frac{\Delta H}{n R T^2} = \frac{\Delta_r H_m}{R T^2} \quad (2)$$

(2)  $Q_{st}$  was determined by fitting the adsorption isotherms at 273 and 298 K to the Dual-site Langmuir equation (Eqn 3);

$$n = \frac{n_{L,A} b_A p}{1 + b_A p} + \frac{n_{L,B} b_B p}{1 + b_B p} \quad (3)$$

Where  $n$  is the amount of gas adsorbed in mmol/g,  $P$  is the pressure in Pa,  $n_{L,A}$  and  $n_{L,B}$  are the saturation capacity in mmol/g, and  $b_A$  and  $b_B$  are the Langmuir parameter of adsorption sites 1 and 2.

Using the Dual-site Langmuir equation fit, the isosteric heat of adsorption can be calculated for the material as a function of the total amount of gas adsorbed using the Clausius-Clapeyron equation (Eqn 2).

(3)  $Q_{st}$  was determined by fitting the adsorption isotherms at 273 and 298 K to the Langmuir-Freundlich equation (Eqn 4);

$$n = \frac{n_L b p^{\frac{1}{t}}}{1 + b p^{\frac{1}{t}}} \quad (4)$$

Where  $n$  is the amount of gas adsorbed in mmol/g,  $P$  is the pressure in Pa,  $n_L$  is the saturation capacity in mmol/g, and  $b$  is the Langmuir parameter of adsorption site, and  $t$  represent the number of the adsorption sites.

Using the Langmuir-Freundlich equation fit, the isosteric heat of adsorption can be calculated for the material as a function of the total amount of gas adsorbed using the

---

Clausius-Clapeyron equation (Eqn 2).

(4)  $Q_{st}$  was determined by fitting the adsorption isotherms at 273 and 298 K to the Toth equation (Eqn 5);

$$n = \frac{n_L b p}{[1 + (b p)^t]^{1/t}} \quad (5)$$

Where  $n$  is the amount of gas adsorbed in mmol/g,  $P$  is the pressure in Pa,  $n_L$  is the saturation capacity in mmol/g, and  $b$  is the Langmuir parameter of adsorption site, and  $t$  represent the inhomogeneity of the adsorbed surface.

Using the Langmuir-Freundlich equation fit, the isosteric heat of adsorption can be calculated for the material as a function of the total amount of gas adsorbed using the Clausius-Clapeyron equation (Eqn 2).

(5)  $Q_{st}$  was determined by fitting the adsorption isotherms at 273 and 298 K to the virial 2 equation (Eqn 6);

$$\ln P = \ln(N) + \left(\frac{1}{T}\right) \sum_{i=0}^m a_i \times N_i + \sum_{j=0}^n b_j \times N_j \quad (6)$$

Where  $N$  is the amount of gas adsorbed in mmol/g,  $P$  is the pressure in Pa,  $a_i$  and  $b_j$  are the empirical constant, and  $T$  is the temperature in K.

Using the virial 2 equation fit, the isosteric heat of adsorption can be calculated for the material as a function of the total amount of gas adsorbed using the Clausius-Clapeyron equation (Eqn 2).

### IAST calculation of adsorption selectivity:

IAST (Ideal Adsorption Solution Theory) was used to predict binary mixture adsorption from the experimental pure gas isotherms.<sup>3-5</sup> In order to perform the integrations required by IAST, the single-component isotherms should be fitted by a proper model. In practice, several methods to do this are available. We found for this set of data that the dual-site Langmuir-Freundlich equation (Eqn 7) was successful in fitting the data. As can be seen in Figure S28-31 and Table S8-11, the model fits the isotherms very well ( $R^2 > 0.9999$ ).

$$q = \frac{q_{m,1} b_1 p^{1/n_1}}{1 + b_1 p^{1/n_1}} + \frac{q_{m,2} b_2 p^{1/n_2}}{1 + b_2 p^{1/n_2}} \quad (\text{Eqn 7})$$

Herein,  $P$  is the pressure of the bulk gas at equilibrium with the adsorbed phase (kPa),  $q$  is the adsorbed amount per mass of adsorbent (mmol/g),  $q_{m,1}$  and  $q_{m,2}$  are the saturation capacities of sites 1 and 2 (mmol/g),  $b_1$  and  $b_2$  are the affinity coefficients of sites 1 and 2 (1/kPa), and  $n_1$  and  $n_2$  represent the deviations from an ideal homogeneous surface. The fitted parameters were then used to predict multicomponent adsorption with IAST.

The selectivity  $S_{A/B}$  in a binary mixture of components A and B is defined as  $(x_A/y_A)/(x_B/y_B)$ , where  $x_i$  and  $y_i$  are the mole fractions of component  $i$  ( $i = A, B$ ) in the adsorbed and bulk phases, respectively

(a)

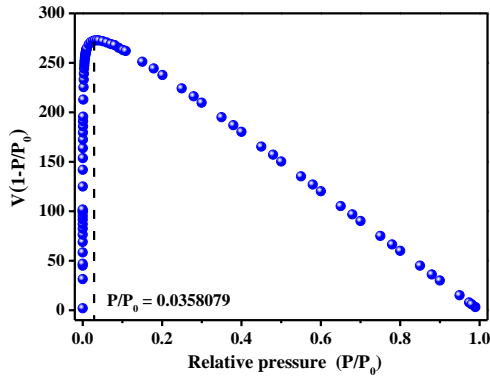

(b)

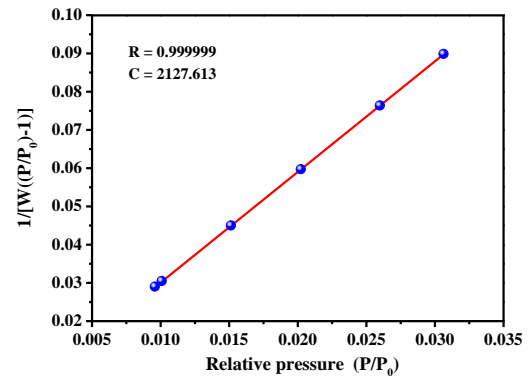

**Fig. S14** (a)  $V(1-P/P_0)$  vs.  $P/P_0$  for Tb-NTB-HNTB, only the range below  $P/P_0 = 0.035$  satisfies the first consistency criterion for applying the BET theory and (b) plot of the linear region for the BET equation.

(a)

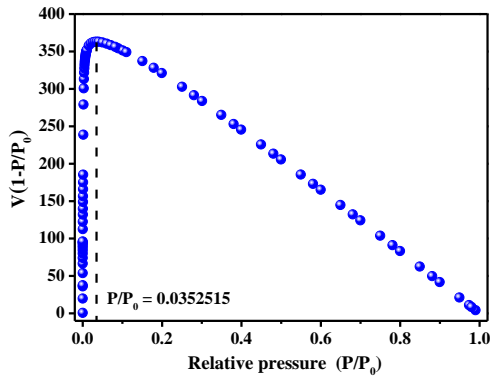

(b)

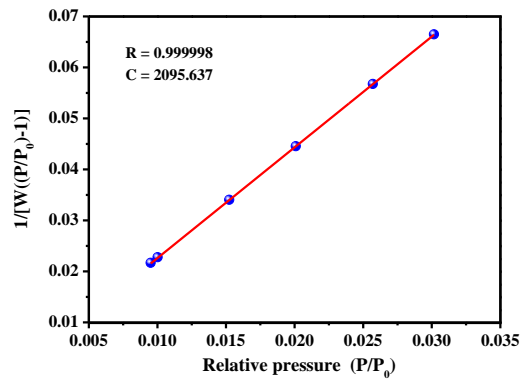

**Fig. S15** (a)  $V(1-P/P_0)$  vs.  $P/P_0$  for Tb-NTB-BDC, only the range below  $P/P_0 = 0.035$  satisfies the first consistency criterion for applying the BET theory and (b) plot of the linear region for the BET equation.

(a)

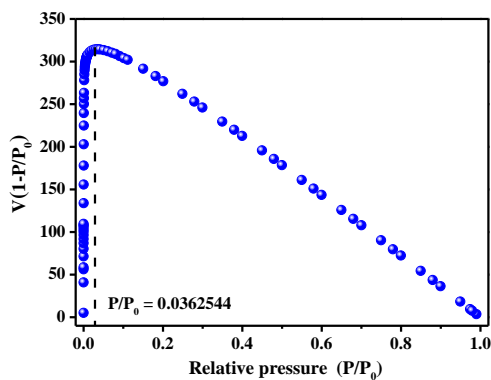

(b)

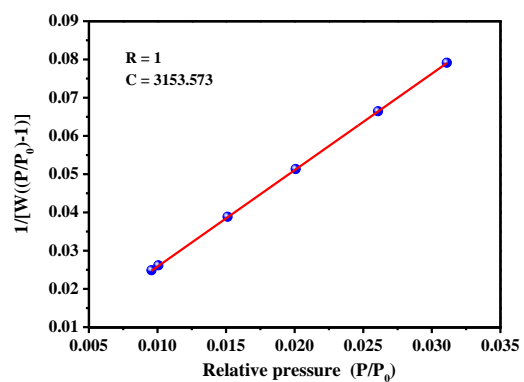

**Fig. S16** (a)  $V(1-P/P_0)$  vs.  $P/P_0$  for Tb-NTB-1,4-NDC, only the range below  $P/P_0 = 0.036$  satisfies the first consistency criterion for applying the BET theory and (b) plot of the linear region for the BET equation.

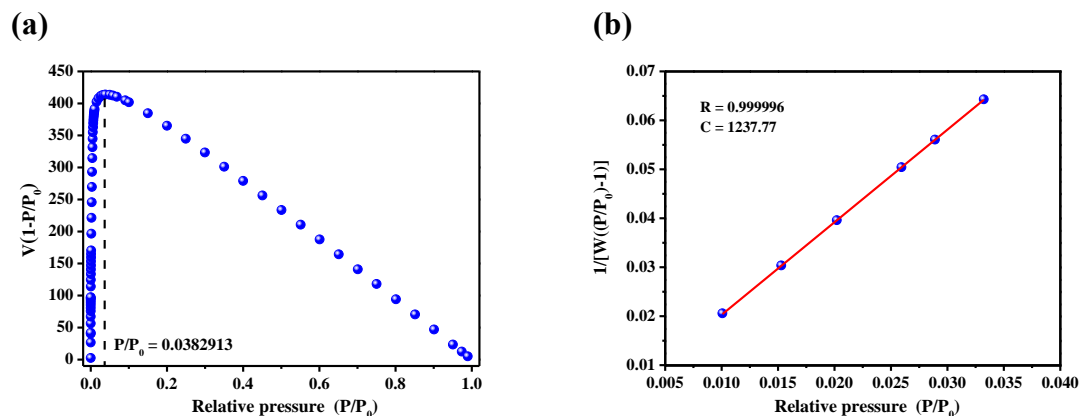

**Fig. S17** (a)  $V(1-P/P_0)$  vs.  $P/P_0$  for Tb-NTB-DTTDC, only the range below  $P/P_0 = 0.038$  satisfies the first consistency criterion for applying the BET theory and (b) plot of the linear region for the BET equation.

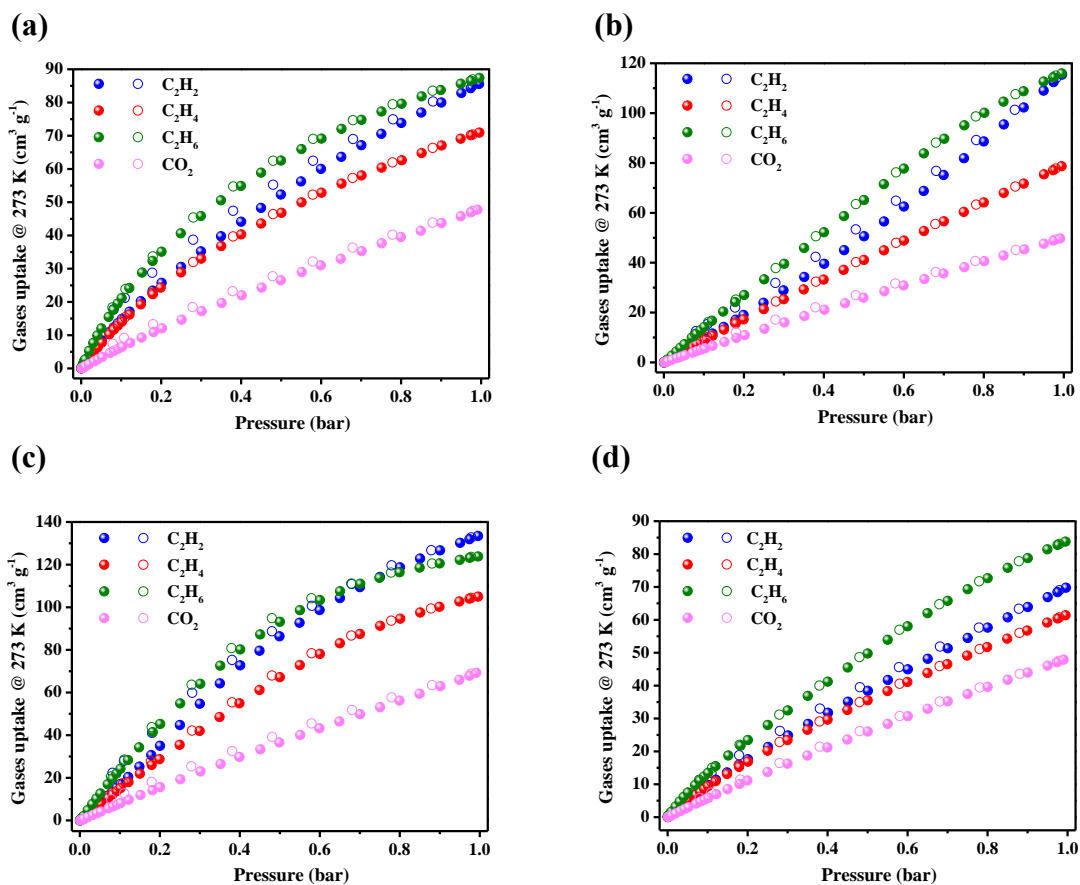

**Fig. S18** Pure component sorption isotherms of different gases for (a) Tb-NTB-HNTB, (b) Tb-NTB-BDC, (c) Tb-NTB-1,4-NDC and (d) Tb-NTB-DTTDC at 273 K, respectively.

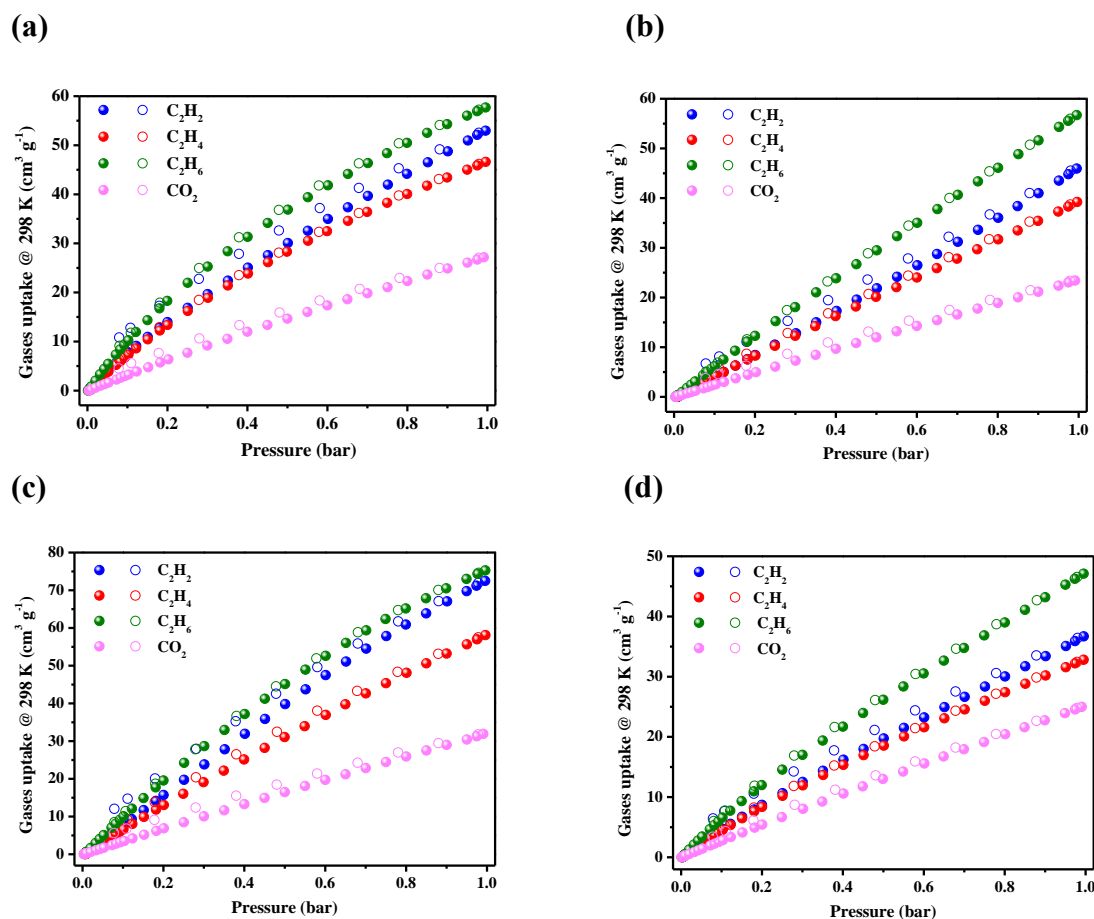

**Fig. S19** Pure component sorption isotherms of different gases for (a) Tb-NTB-HNTB, (b) Tb-NTB-BDC, (c) Tb-NTB-1,4-NDC and (d) Tb-NTB-DTTDC at 298 K, respectively.

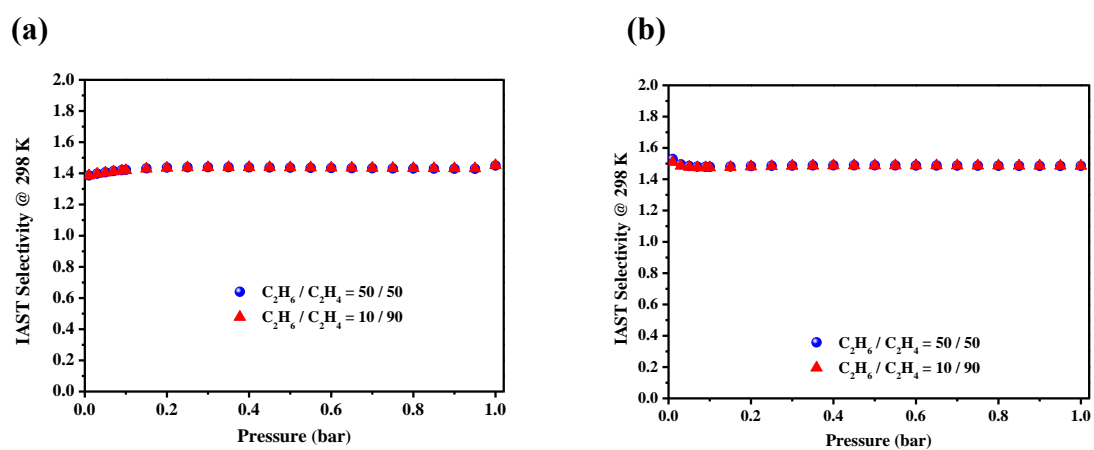

**Fig. S20** IAST selectivity of (a) Tb-NTB-HNTB and (b) Tb-NTB-BDC under different ethane/ethylene ratios.

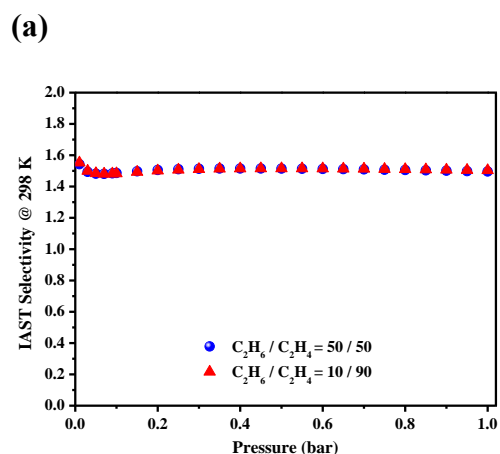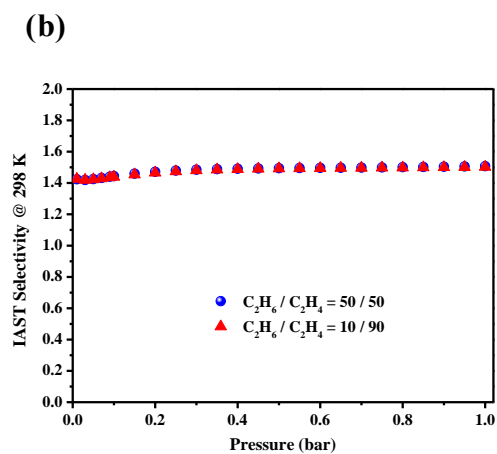

**Fig. S21** IAST selectivity of (a) Tb-NTB-1,4-NDC and (b) Tb-NTB-DTTDC under different ethane/ethylene ratios.

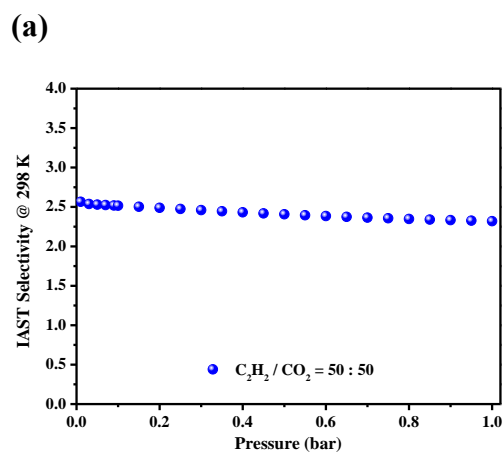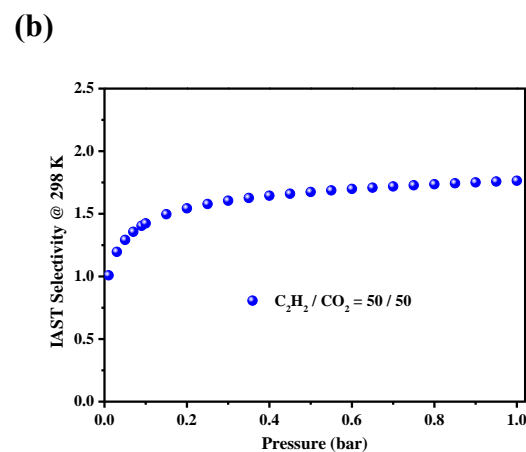

**Fig. S22** Acetylene/carbon dioxide IAST selectivity of (a) Tb-NTB-HNTB and (b) Tb-NTB-BDC.

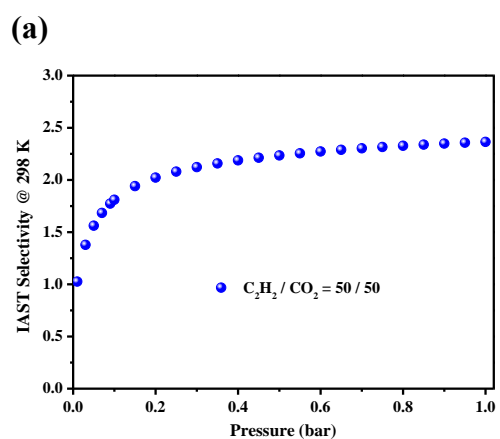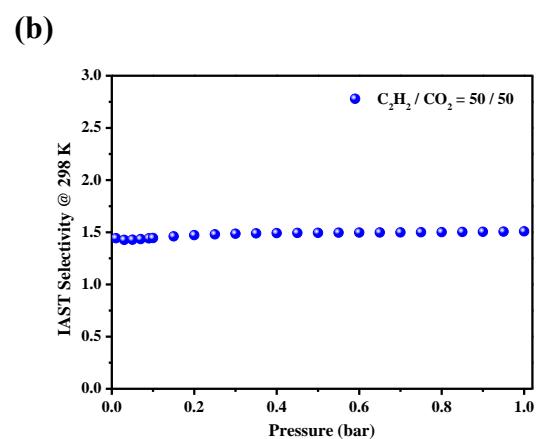

**Fig. S23** Acetylene/carbon dioxide IAST selectivity of (a) Tb-NTB-1,4-NDC and (b) Tb-NTB-DTTDC.



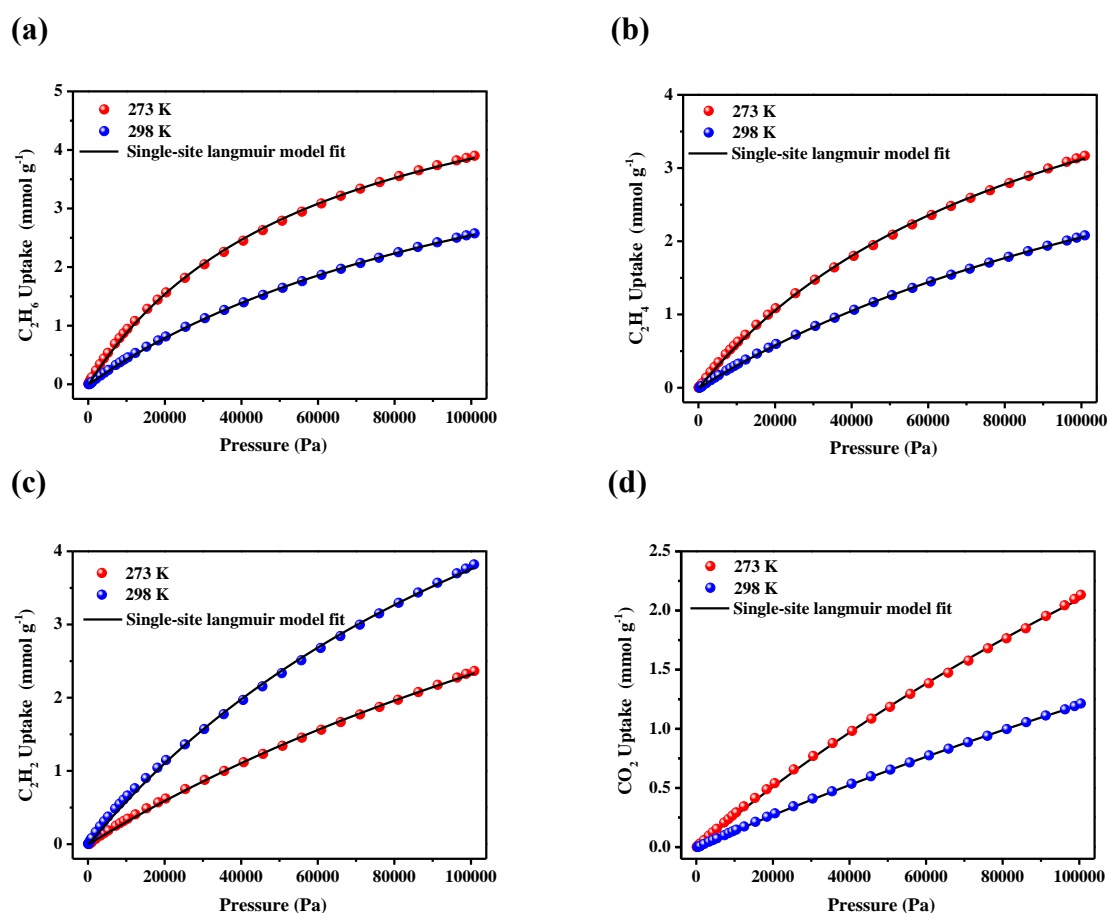

**Fig. S24** Single-site Langmuir (SSL) model fitting (lines) of  $C_2H_6$ ,  $C_2H_4$ ,  $C_2H_2$  and  $CO_2$  adsorption isotherms (points) for Tb-NTB-HNTB measured at 273 and 298 K.

**Table S1.** The obtained SSL model fitting parameters of different gases for Tb-NTB-HNTB.

|       | Tb-NTB-HNTB |            |            |            |            |            |         |            |
|-------|-------------|------------|------------|------------|------------|------------|---------|------------|
|       | $C_2H_6$    |            | $C_2H_4$   |            | $C_2H_2$   |            | $CO_2$  |            |
| T (K) | 273         | 298        | 273        | 298        | 273        | 298        | 273     | 298        |
| $Q$   | 6.14275     | 5.66819    | 6.06458    | 5.61515    | 9.30849    | 8.45261    | 9.18854 | 8.23784    |
| $b$   | 1.68511E-5  | 8.16234E-6 | 1.06056E-5 | 5.78079E-6 | 6.77355E-6 | 3.78677E-6 | 9.18854 | 1.70789E-6 |
| $R^2$ | 0.9996      | 0.9998     | 0.9997     | 0.99991    | 0.9994     | 0.9995     | 0.9997  | 0.99993    |

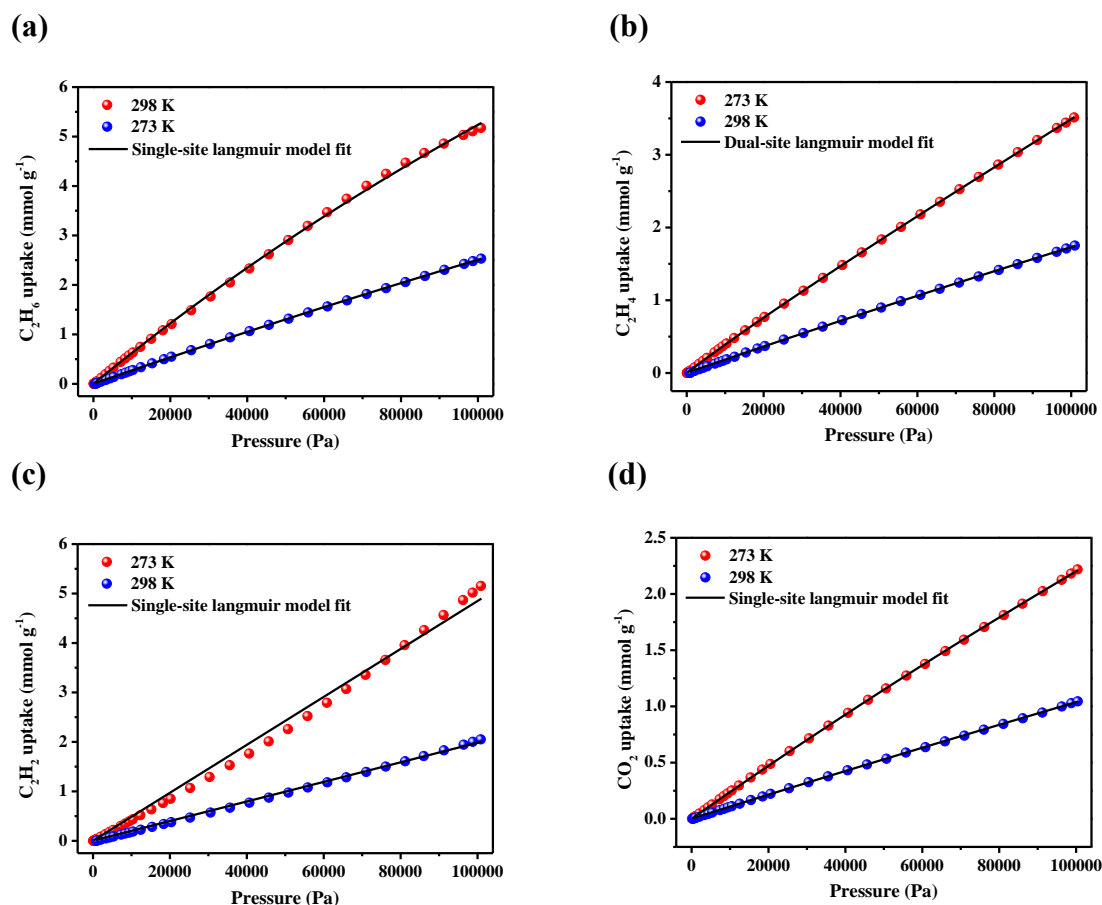

**Fig. S25** Single/dual-site Langmuir model fitting (lines) of  $C_2H_6$ ,  $C_2H_4$ ,  $C_2H_2$  and  $CO_2$  adsorption isotherms (points) for Tb-NTB-BDC measured at 273 and 298 K.

**Table S2.** The obtained SSL model fitting parameters of different gases for Tb-NTB-BDC.

| T (K) | Tb-NTB-BDC |           |             |            |            |            |
|-------|------------|-----------|-------------|------------|------------|------------|
|       | $C_2H_6$   |           | $C_2H_2$    |            | $CO_2$     |            |
|       | 273        | 298       | 273         | 298        | 273        | 298        |
| $Q$   | 29.313     | 34.2567   | 52441.7     | 12803.2    | 26.5724    | 28.4074    |
| $b$   | 2.17561E-6 | 7.8937E-7 | 9.24993E-10 | 1.54744E-9 | 9.03594E-7 | 3.78723E-7 |
| $R^2$ | 0.9996     | 0.99994   | 0.995       | 0.999      | 0.99998    | 0.99995    |

**Table S3.** The obtained dual-site Langmuir (DSL) model fitting parameters of  $C_2H_4$  for Tb-NTB-BDC.

| T (K) | Tb-NTB-BDC_ $C_2H_4$ |         |            |            |         |
|-------|----------------------|---------|------------|------------|---------|
|       | $Q_1$                | $Q_2$   | $b_1$      | $b_2$      | $R_2$   |
| 273   | 0.300215             | 227.853 | 2.34348E-5 | 1.46065E-7 | 0.99999 |
| 298   | 2.08892              | 179.478 | 2.32848E-6 | 7.49329E-8 | 0.99990 |

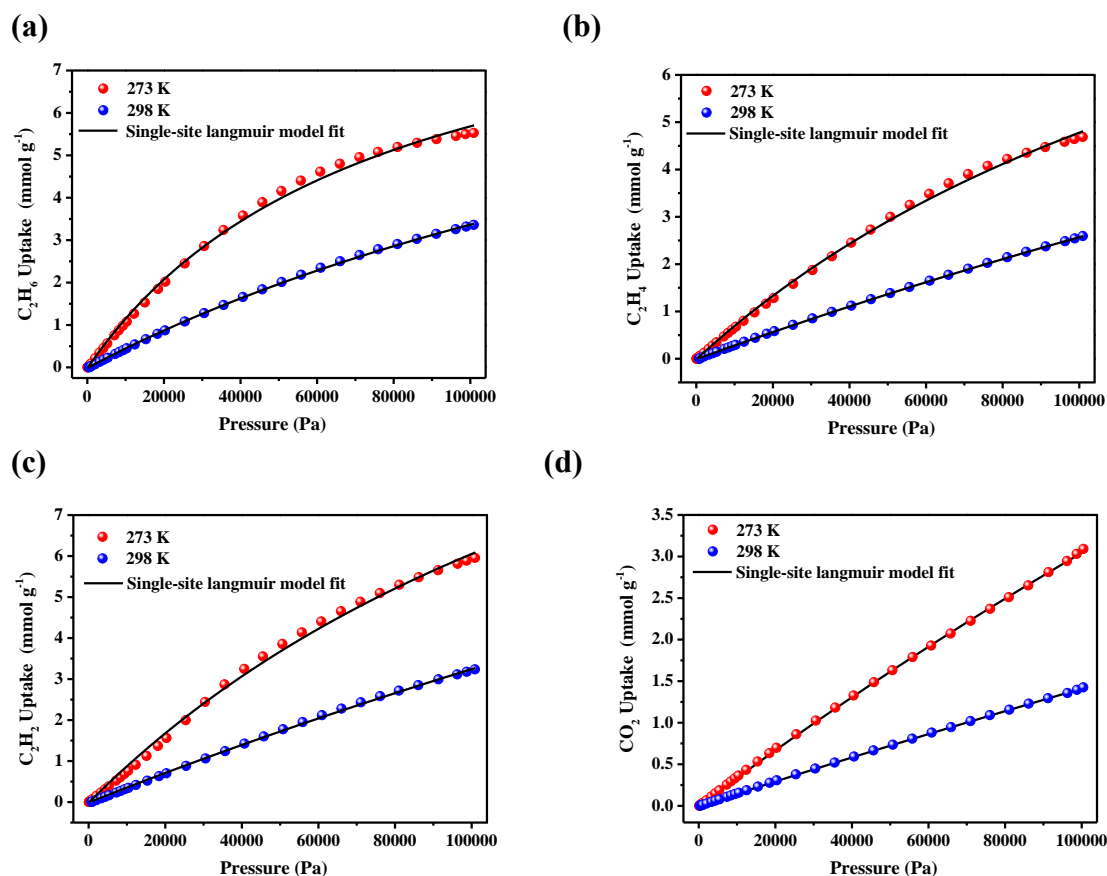

**Fig. S26** SSL model fitting (lines) of  $C_2H_6$ ,  $C_2H_4$ ,  $C_2H_2$  and  $CO_2$  adsorption isotherms (points) for Tb-NTB-1,4-NDC measured at 273 and 298 K.

**Table S4.** The obtained SSL model fitting parameters of different gases for Tb-NTB-1,4-NDC.

| T (K) | Tb-NTB-1,4-NDC |            |            |            |            |            |            |            |
|-------|----------------|------------|------------|------------|------------|------------|------------|------------|
|       | $C_2H_6$       |            | $C_2H_4$   |            | $C_2H_2$   |            | $CO_2$     |            |
|       | 273            | 298        | 273        | 298        | 273        | 298        | 273        | 298        |
| $Q$   | 10.0167        | 11.5592    | 13.3751    | 20.9562    | 17.1142    | 26.6031    | 25.8809    | 23.5291    |
| $b$   | 1.31512E-5     | 4.12169E-6 | 5.57164E-6 | 1.40188E-6 | 5.48183E-6 | 1.39206E-6 | 1.33496E-6 | 6.38956E-6 |
| $R^2$ | 0.998          | 0.9997     | 0.999      | 0.9999     | 0.998      | 0.9993     | 0.9999     | 0.99997    |

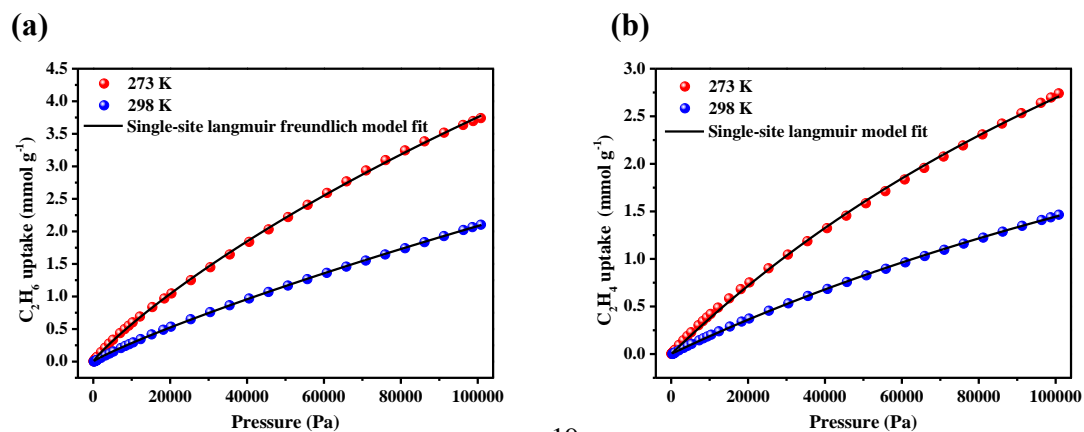

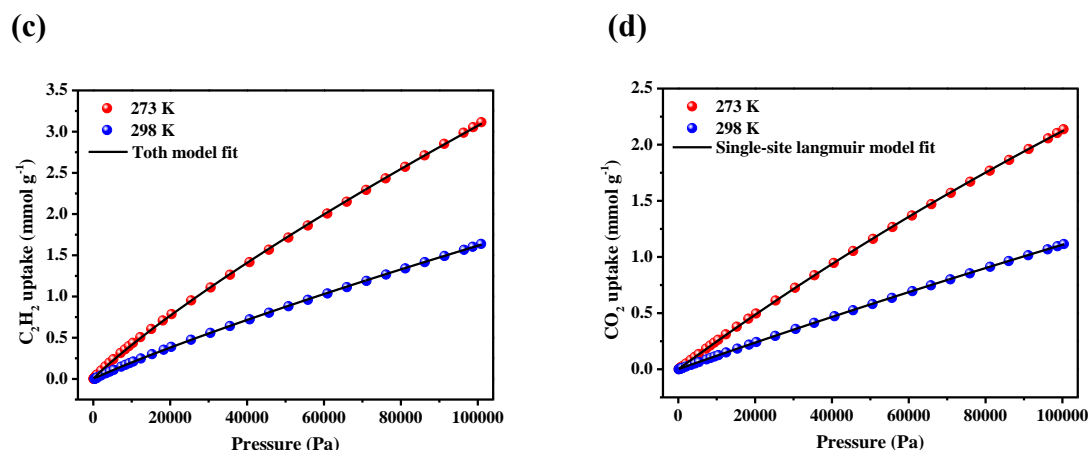

**Fig. S27** Different model fitting (lines) of  $C_2H_6$ ,  $C_2H_4$ ,  $C_2H_2$  and  $CO_2$  adsorption isotherms (points) for Tb-NTB-DTTDC measured at 273 and 298 K.

**Table S5.** The obtained single-site Langmuir-Freundlich (SSLF) model fitting parameters of  $C_2H_6$  for Tb-NTB-DTTDC.

| Tb-NTB-DTTDC_ $C_2H_6$ |         |            |         |        |
|------------------------|---------|------------|---------|--------|
| T (K)                  | $Q$     | $b$        | $t$     | $R^2$  |
| 273                    | 21.3703 | 7.82936E-6 | 1.12739 | 0.9998 |
| 298                    | 25.9424 | 2.76738E-6 | 1.11149 | 0.9998 |

**Table S6.** The obtained toth model fitting parameters of  $C_2H_2$  for Tb-NTB-DTTDC.

| Tb-NTB-DTTDC_ $C_2H_2$ |         |            |          |         |
|------------------------|---------|------------|----------|---------|
| T (K)                  | $Q$     | $b$        | $t$      | $R^2$   |
| 273                    | 1936.27 | 3.03859E-8 | 0.27882  | 0.99992 |
| 298                    | 441.305 | 5.28891E-8 | 0.368046 | 0.99993 |

**Table S7.** The obtained SSL model fitting parameters of  $C_2H_4$  and  $CO_2$  for Tb-NTB-DTTDC.

| Tb-NTB-DTTDC |            |            |            |            |
|--------------|------------|------------|------------|------------|
| T (K)        | $C_2H_4$   |            | $CO_2$     |            |
|              | 273        | 298        | 273        | 298        |
| $Q$          | 8.61675    | 5.8366     | 13.5173    | 14.3346    |
| $b$          | 4.54529E-6 | 3.28571E-6 | 1.86159E-6 | 8.37804E-7 |
| $R^2$        | 0.9995     | 0.9998     | 0.99996    | 0.99999    |

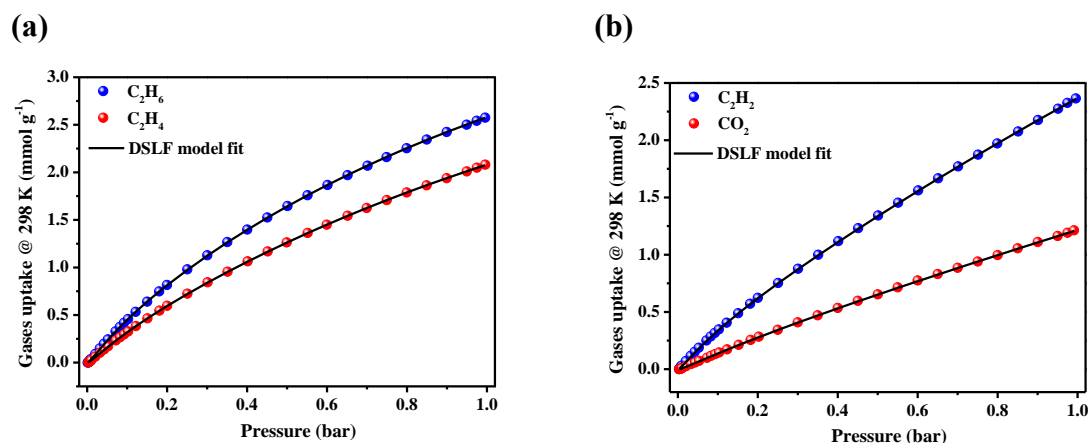

**Fig. S28** Dual-site Langmuir-Freundlich (DSLFL) equation fits (lines) and adsorption isotherms (points) of different gases at 298 K for Tb-NTB-HNTB.

**Table S8.** DSLFL equation fitting parameters of different gases adsorption isotherms for Tb-NTB-HNTB.

| gases                  | Tb-NTB-HNTB                   |                               |                               |                      |
|------------------------|-------------------------------|-------------------------------|-------------------------------|----------------------|
|                        | C <sub>2</sub> H <sub>6</sub> | C <sub>2</sub> H <sub>4</sub> | C <sub>2</sub> H <sub>2</sub> | CO <sub>2</sub>      |
| $q_{m,1}$              | 0.420846071691397             | 5.03519176203756              | 13.0056903440927              | 0.298001486765098    |
| $q_{m,2}$              | 5.15241978055003              | 0.279146171810375             | 0.340210682583206             | 9.85033945385185     |
| $b_1$                  | 0.0513874748946263            | 0.00279510840481467           | 0.00122721449344107           | 0.020774672279944    |
| $b_2$                  | 0.00346658078881192           | 0.0443988866234479            | 0.0479070868700344            | 0.000501974391862696 |
| $n_1$                  | 1.26462134082121              | 1.15304243244317              | 1.09020923329425              | 1.14296683549559     |
| $n_2$                  | 1.16323559673573              | 1.28344968940332              | 1.18939053111837              | 1.16892137160416     |
| <i>Reduced Chi-Sqr</i> | 0.0109265540216912            | 0.00728418092232908           | 0.0105203873193918            | 0.00553066167357095  |
| $R^2$                  | 0.999991655279612             | 0.999991930145717             | 0.999989169429934             | 0.999980516309631    |

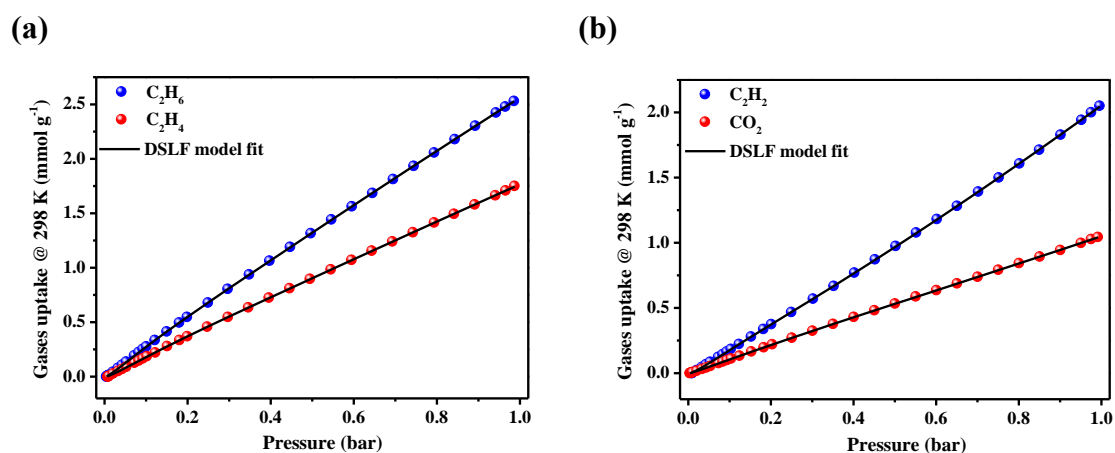

**Fig. S29** DSLFL equation fits (lines) and adsorption isotherms (points) of different gases at 298 K for Tb-NTB-BDC.

**Table S9.** DSLF equation fitting parameters of different gases adsorption isotherms for Tb-NTB-BDC.

| gases                  | Tb-NTB-BDC                    |                               |                               |                      |
|------------------------|-------------------------------|-------------------------------|-------------------------------|----------------------|
|                        | C <sub>2</sub> H <sub>6</sub> | C <sub>2</sub> H <sub>4</sub> | C <sub>2</sub> H <sub>2</sub> | CO <sub>2</sub>      |
| $q_{m,1}$              | 0.327233840215966             | 12.6652464750874              | 0.185164661537376             | 0.433693202297006    |
| $q_{m,2}$              | 17.1194375909266              | 0.278040401847284             | 67.1609048604896              | 169.648371369297     |
| $b_1$                  | 0.0287217115678155            | 0.000440082073102288          | 0.0210629070509327            | 0.0152746992353958   |
| $b_2$                  | 0.00056724949729822           | 0.0217831221646556            | 0.0000960301693313378         | 0.000012798646278699 |
| $n_1$                  | 1.29334725390801              | 1.2428367188978               | 1.43012985099801              | 1.07376488635654     |
| $n_2$                  | 1.21216486751986              | 1.30306133620069              | 1.23616664927746              | 1.26922361080483     |
| <i>Reduced Chi-Sqr</i> | 0.00825625505281445           | 0.0130135411239726            | 0.0147442926248288            | 0.000579008163234031 |
| $R^2$                  | 0.99999468239069              | 0.999980212158248             | 0.999982807182008             | 0.999990186464511    |

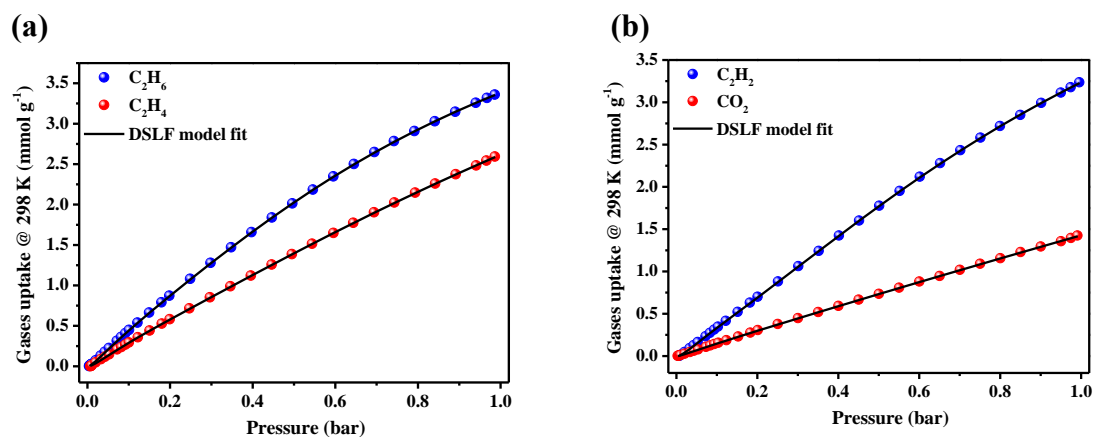

**Fig. S30** DSLF equation fits (lines) and adsorption isotherms (points) of different gases at 298 K for Tb-NTB-1,4-NDC.

**Table S10.** DSLF equation fitting parameters of different gases adsorption isotherms for Tb-NTB-1,4-NDC.

| gases                  | Tb-NTB-1,4-NDC                |                               |                               |                      |
|------------------------|-------------------------------|-------------------------------|-------------------------------|----------------------|
|                        | C <sub>2</sub> H <sub>6</sub> | C <sub>2</sub> H <sub>4</sub> | C <sub>2</sub> H <sub>2</sub> | CO <sub>2</sub>      |
| $q_{m,1}$              | 5.23090428247555              | 0.247025362597105             | 0.272834328684922             | 14.4045704161387     |
| $q_{m,2}$              | 0.592278125755337             | 8.20010477889055              | 6.51054329158239              | 0.0785178486599558   |
| $b_1$                  | 0.00101273592815756           | 0.0356630931589339            | 0.038641633896936             | 0.000667224525439433 |
| $b_2$                  | 0.0427849251802233            | 0.00106458673722291           | 0.000964277903800458          | 0.0316020147723429   |
| $n_1$                  | 1.52930533501073              | 1.46959028139296              | 1.54364622849256              | 1.09421538154672     |
| $n_2$                  | 1.29665877304217              | 1.28960098894832              | 1.46703363797057              | 1.3367355888448      |
| <i>Reduced Chi-Sqr</i> | 0.00457077748626839           | 0.0164677640982831            | 0.00598976286656235           | 0.000201853455599139 |
| $R^2$                  | 0.999995705941814             | 0.99998336961172              | 0.999991867252086             | 0.999985421115335    |

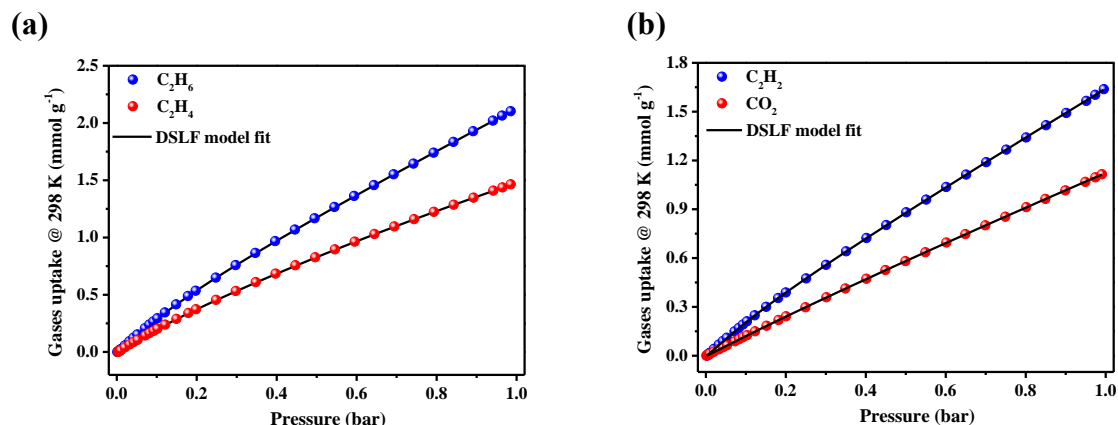

**Fig. S31** DSLF equation fits (lines) and adsorption isotherms (points) of different gases at 298 K for Tb-NTB-DTTDC.

**Table S11.** DSLF equation fitting parameters of different gases adsorption isotherms for Tb-NTB-DTTDC.

| gases                  | Tb-NTB-DTTDC                  |                               |                               |                      |
|------------------------|-------------------------------|-------------------------------|-------------------------------|----------------------|
|                        | C <sub>2</sub> H <sub>6</sub> | C <sub>2</sub> H <sub>4</sub> | C <sub>2</sub> H <sub>2</sub> | CO <sub>2</sub>      |
| $q_{m,1}$              | 18.4851260543874              | 6.51714315058874              | 0.234510916139449             | 0.393201421985735    |
| $q_{m,2}$              | 0.447079838812974             | 0.201324518299416             | 17.5815468698429              | 8.57369132550398     |
| $b_1$                  | 0.000555128928795798          | 0.00138214040896643           | 0.0387713820674364            | 0.022089681501044    |
| $b_2$                  | 0.034693339500298             | 0.041558369981383             | 0.000527961168941006          | 0.000342717928022305 |
| $n_1$                  | 1.13310442340014              | 1.12454177580067              | 1.16651999973779              | 0.979204435496264    |
| $n_2$                  | 1.16271511626126              | 1.20807790794357              | 1.11007548404262              | 1.25354454619881     |
| <i>Reduced Chi-Sqr</i> | 0.00574301582562789           | 0.00451624218950283           | 0.00538680902501112           | 0.000416185955404125 |
| $R^2$                  | 0.99999432988281              | 0.999991671397619             | 0.999991446859797             | 0.999997123906926    |

---

## Section 6. High-Pressure Methane Sorption Measurements

High-pressure excess methane sorption isotherms were measured with an automatic volumetric sorption apparatus (BELSORP-HP) in the range of 0-80 bar. The bath temperature for CH<sub>4</sub> sorption measurements was controlled using a recirculating bath containing an ethylene glycol/H<sub>2</sub>O mixture. Ultrahigh purity He was used to determine the dead space of the sample cell. The sorption data were corrected to give the final gravimetric excess sorption isotherm  $n_{ex}(P, T)$ , by subtracting the background sorption measured with the empty sample cell using the same test parameters. The total sorption, which represents the real gas-storage performance of the porous material but cannot be directly measured, was calculated by [Eqn. 8]:

$$n_{tot}(P, T) = n_{ex}(P, T) + \rho_{gas}(P, T) \times V_p \quad (8)$$

Where  $\rho_{gas}(P, T)$  is the density of bulk methane at pressure  $P$  and temperature  $T$ , and  $V_p$  is the pore volume of the porous material determined from N<sub>2</sub> adsorption isotherm at 77 K.

The isosteric enthalpy of adsorption,  $Q_{st}$  for methane was determined by fitting the adsorption isotherms at 273 and 298 K to the Dual-site Langmuir equation (Eqn 3);

Using the Dual-site Langmuir fit, the isosteric heat of adsorption can be calculated for the material as a function of the total amount of methane adsorbed using the Clausius-Clapeyron relation (Eqn 2).



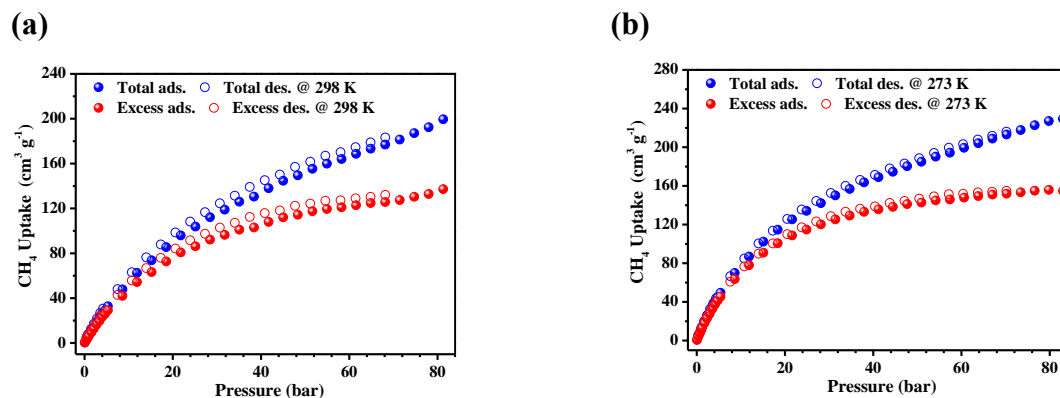

**Fig. S32** High-pressure CH<sub>4</sub> sorption isotherms for Tb-NTB-DTTDC at (a) 298 K and (b) 273 K, respectively.

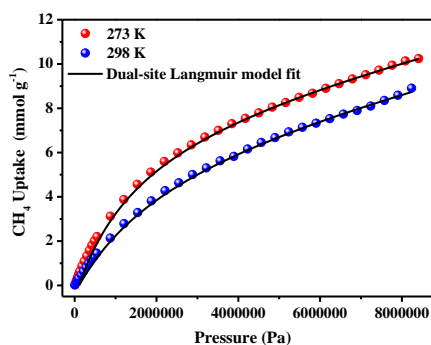

**Fig. S33** DSL model fitting (lines) of CH<sub>4</sub> adsorption isotherms (points) for Tb-NTB-DTTDC measured at 273 and 298 K.

**Table S12.** The obtained DSL model fitting parameters for Tb-NTB-DTTDC.

| T (K) | $n_{L,A}$ | $n_{L,B}$ | $b_A$      | $b_B$       | $R^2$    |
|-------|-----------|-----------|------------|-------------|----------|
| 273   | 2412.59   | 8.29488   | 1.6518E-10 | 5.88412E-7  | 0.999937 |
| 298   | 7.13986   | 1939.48   | 3.97923E-7 | 2.05572E-10 | 0.99979  |

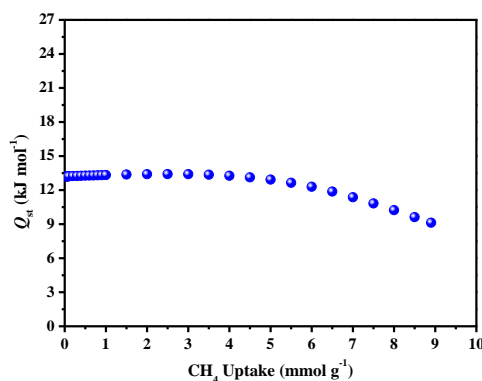

**Fig. S34** Heats of CH<sub>4</sub> adsorption ( $Q_{st}$ ) for Tb-NTB-DTTDC, which were calculated from the Dual-site Langmuir model fitting of adsorption isotherms at 273 and 298 K as a function of the total CH<sub>4</sub> uptake amount using the Clausius-Clapeyron equation:

$$\frac{d \ln p}{dT} = \frac{\Delta H}{nRT^2} = \frac{\Delta_r H_m}{RT^2}.$$

---

## Section 7. Single Crystal X-ray Crystallography Data

Single-crystal X-ray diffraction data for Tb-NTB-HNTB, Tb-NTB-BDC, Tb-NTB-1,4-NDC, Tb-NTB-DTTDC and Tb-NTB-OBDC were collected on a Bruker D8 venture diffractometer (Cu/K $\alpha$ ,  $\lambda = 1.54178 \text{ \AA}$ ) at 243 K. Indexing was performed using APEX3 (Difference Vectors method).<sup>6</sup> Data integration and reduction were performed using SaintPlus 6.01.<sup>7</sup> Absorption correction was performed by multi-scan method implemented in SADABS.<sup>8</sup> Space group was determined using XPREP implemented in APEX3. The structure was solved by direct methods and refined with full-matrix least squares technique using the SHELXT<sup>9</sup> package or refined using SHELXL-2014 (full-matrix least-squares on  $F^2$ ) contained in Olex2.<sup>10</sup> Non-hydrogen atoms were refined with anisotropic displacement parameters during the final cycles. Hydrogen atoms were located at geometrically calculated positions to their carrier atoms and refined with isotropic thermal parameters included in the final stage of the refinement. For these compounds, the contributions of heavily disordered solvent molecules were treated as diffuse using Squeeze procedure implemented in Platon program.<sup>11-13</sup>

A summary of the crystallographic data is given in Table S13-17. CCDC 2235992-2235996 (Tb-NTB-HNTB, Tb-NTB-BDC, Tb-NTB-1,4-NDC, Tb-NTB-DTTDC and Tb-NTB-OBDC) contain the supplementary crystallographic data for this paper. These data can be obtained free of charge from The Cambridge Crystallographic Data Centre.

**Table S13.** Crystal data and refinement results for Tb-NTB-HNTB.

| <b>Identification code</b>                          | <b>Tb-NTB-HNTB</b>                                                                              |
|-----------------------------------------------------|-------------------------------------------------------------------------------------------------|
| Empirical formula                                   | C <sub>42</sub> H <sub>24</sub> N <sub>2</sub> O <sub>17</sub> F <sub>4</sub> Tb <sub>3</sub>   |
| Formula weight                                      | 1381.42                                                                                         |
| Temperature/K                                       | 243.0                                                                                           |
| Wavelength/Å                                        | 1.54178                                                                                         |
| Crystal system                                      | Monoclinic                                                                                      |
| Space group                                         | <i>C2/m</i>                                                                                     |
| Unit cell dimensions/Å                              | <i>a</i> = 18.018(2)<br><i>b</i> = 31.261(4)<br><i>c</i> = 17.687(3)<br>$\beta$ /° = 111.754(7) |
| Volume/Å <sup>3</sup>                               | 9253(2)                                                                                         |
| Z                                                   | 4                                                                                               |
| Density (calculated)/Mg/m <sup>3</sup>              | 0.992                                                                                           |
| Absorption coefficient/mm <sup>-1</sup>             | 11.473                                                                                          |
| F (000)                                             | 2628.0                                                                                          |
| Crystal size/mm <sup>3</sup>                        | 0.16 × 0.08 × 0.08                                                                              |
| Theta range for data collection/°                   | 4.963 to 51.755                                                                                 |
| Index ranges                                        | -18 ≤ <i>h</i> ≤ 18<br>-31 ≤ <i>k</i> ≤ 30<br>-17 ≤ <i>l</i> ≤ 17                               |
| Reflections collected                               | 17740                                                                                           |
| Independent reflections                             | 4968 [ <i>R</i> <sub>int</sub> = 0.0663]                                                        |
| Completeness to theta = 51.755°                     | 94.5%                                                                                           |
| Refinement method                                   | Full-matrix least-squares on <i>F</i> <sup>2</sup>                                              |
| Data / restraints / parameters                      | 4968 / 559 / 293                                                                                |
| Goodness-of-fit on <i>F</i> <sup>2</sup>            | 1.119                                                                                           |
| Final <i>R</i> indices [ <i>I</i> > 2σ( <i>I</i> )] | <i>R</i> <sub>1</sub> = 0.0888, <i>wR</i> <sub>2</sub> = 0.2528                                 |
| <i>R</i> indices (all data)                         | <i>R</i> <sub>1</sub> = 0.0983, <i>wR</i> <sub>2</sub> = 0.2721                                 |
| Largest diff. peak and hole/e.Å <sup>-3</sup>       | 2.05 and -2.43                                                                                  |

**Table S14.** Crystal data and refinement results for Tb-NTB-BDC.

| Identification code                                 | Tb-NTB-BDC                                                                      |
|-----------------------------------------------------|---------------------------------------------------------------------------------|
| Empirical formula                                   | C <sub>33</sub> H <sub>18</sub> NO <sub>12</sub> F <sub>4</sub> Tb <sub>3</sub> |
| Formula weight                                      | 1173.27                                                                         |
| Temperature/K                                       | 243.0                                                                           |
| Wavelength/Å                                        | 1.54178                                                                         |
| Crystal system                                      | Hexagonal                                                                       |
| Space group                                         | <i>P</i> 6 <sub>3</sub> / <i>mcm</i>                                            |
| Unit cell dimensions/Å                              | <i>a</i> = 18.0166(4)<br><i>c</i> = 27.4264(6)                                  |
| Volume/Å <sup>3</sup>                               | 7709.8(4)                                                                       |
| Z                                                   | 4                                                                               |
| Density (calculated)/Mg/m <sup>3</sup>              | 1.011                                                                           |
| Absorption coefficient/mm <sup>-1</sup>             | 13.639                                                                          |
| F (000)                                             | 2200.0                                                                          |
| Crystal size/mm <sup>3</sup>                        | 0.08 × 0.08 × 0.03                                                              |
| Theta range for data collection/°                   | 4.29 to 54.238                                                                  |
| Index ranges                                        | -17 ≤ <i>h</i> ≤ 18<br>-16 ≤ <i>k</i> ≤ 18<br>-28 ≤ <i>l</i> ≤ 25               |
| Reflections collected                               | 17728                                                                           |
| Independent reflections                             | 1719 [ <i>R</i> <sub>int</sub> = 0.0343]                                        |
| Completeness to theta = 54.238°                     | 99.4%                                                                           |
| Refinement method                                   | Full-matrix least-squares on <i>F</i> <sup>2</sup>                              |
| Data / restraints / parameters                      | 1719 / 12 / 90                                                                  |
| Goodness-of-fit on <i>F</i> <sup>2</sup>            | 1.135                                                                           |
| Final <i>R</i> indices [ <i>I</i> > 2σ( <i>I</i> )] | <i>R</i> <sub>1</sub> = 0.0582, <i>wR</i> <sub>2</sub> = 0.1861                 |
| <i>R</i> indices (all data)                         | <i>R</i> <sub>1</sub> = 0.0624, <i>wR</i> <sub>2</sub> = 0.1916                 |
| Largest diff. peak and hole/e.Å <sup>-3</sup>       | 1.89 and -1.75                                                                  |

**Table S15.** Crystal data and refinement results for Tb-NTB-1,4-NDC.

| Identification code                                 | Tb-NTB-1,4-NDC                                                                                |
|-----------------------------------------------------|-----------------------------------------------------------------------------------------------|
| Empirical formula                                   | C <sub>45</sub> H <sub>21</sub> N <sub>4</sub> O <sub>15</sub> F <sub>4</sub> Tb <sub>3</sub> |
| Formula weight                                      | 1431.58                                                                                       |
| Temperature/K                                       | 243.0                                                                                         |
| Wavelength/Å                                        | 1.54178                                                                                       |
| Crystal system                                      | Hexagonal                                                                                     |
| Space group                                         | <i>P6<sub>3</sub>/mcm</i>                                                                     |
| Unit cell dimensions/Å                              | <i>a</i> = 18.0378(4)<br><i>c</i> = 27.5886(6)                                                |
| Volume/Å <sup>3</sup>                               | 7773.7(4)                                                                                     |
| Z                                                   | 4                                                                                             |
| Density (calculated)/Mg/m <sup>3</sup>              | 1.223                                                                                         |
| Absorption coefficient/mm <sup>-1</sup>             | 13.657                                                                                        |
| F (000)                                             | 2764.0                                                                                        |
| Crystal size/mm <sup>3</sup>                        | 0.08 × 0.08 × 0.04                                                                            |
| Theta range for data collection/°                   | 5.159 to 54.235                                                                               |
| Index ranges                                        | -18 ≤ <i>h</i> ≤ 17<br>-18 ≤ <i>k</i> ≤ 18<br>-28 ≤ <i>l</i> ≤ 29                             |
| Reflections collected                               | 16985                                                                                         |
| Independent reflections                             | 1681 [ <i>R</i> <sub>int</sub> = 0.0328]                                                      |
| Completeness to theta = 54.235°                     | 96.9%                                                                                         |
| Refinement method                                   | Full-matrix least-squares on <i>F</i> <sup>2</sup>                                            |
| Data / restraints / parameters                      | 1681 / 348 / 189                                                                              |
| Goodness-of-fit on <i>F</i> <sup>2</sup>            | 1.183                                                                                         |
| Final <i>R</i> indices [ <i>I</i> > 2σ( <i>I</i> )] | <i>R</i> <sub>1</sub> = 0.0583, <i>wR</i> <sub>2</sub> = 0.1806                               |
| <i>R</i> indices (all data)                         | <i>R</i> <sub>1</sub> = 0.0621, <i>wR</i> <sub>2</sub> = 0.1852                               |
| Largest diff. peak and hole/e.Å <sup>-3</sup>       | 1.25 and -0.82                                                                                |

**Table S16.** Crystal data and refinement results for Tb-NTB-DTTDC.

| Identification code                                 | Tb-NTB-DTTDC                                                                                     |
|-----------------------------------------------------|--------------------------------------------------------------------------------------------------|
| Empirical formula                                   | C <sub>36</sub> H <sub>15</sub> NO <sub>15</sub> S <sub>4.5</sub> F <sub>4</sub> Tb <sub>3</sub> |
| Formula weight                                      | 1404.57                                                                                          |
| Temperature/K                                       | 243.0                                                                                            |
| Wavelength/Å                                        | 1.54178                                                                                          |
| Crystal system                                      | Hexagonal                                                                                        |
| Space group                                         | <i>P</i> 6 <sub>3</sub> / <i>mcm</i>                                                             |
| Unit cell dimensions/Å                              | <i>a</i> = 17.8807(6)<br><i>c</i> = 34.2217(14)                                                  |
| Volume/Å <sup>3</sup>                               | 9475.5(7)                                                                                        |
| Z                                                   | 4                                                                                                |
| Density (calculated)/Mg/m <sup>3</sup>              | 0.985                                                                                            |
| Absorption coefficient/mm <sup>-1</sup>             | 12.092                                                                                           |
| F (000)                                             | 2668.0                                                                                           |
| Crystal size/mm <sup>3</sup>                        | 0.1 × 0.1 × 0.05                                                                                 |
| Theta range for data collection/°                   | 2.582 to 50.460                                                                                  |
| Index ranges                                        | -13 ≤ <i>h</i> ≤ 15<br>-17 ≤ <i>k</i> ≤ 16<br>-34 ≤ <i>l</i> ≤ 34                                |
| Reflections collected                               | 25841                                                                                            |
| Independent reflections                             | 1820 [ <i>R</i> <sub>int</sub> = 0.0596]                                                         |
| Completeness to theta = 50.460°                     | 99.9%                                                                                            |
| Refinement method                                   | Full-matrix least-squares on <i>F</i> <sup>2</sup>                                               |
| Data / restraints / parameters                      | 1820 / 273 / 180                                                                                 |
| Goodness-of-fit on <i>F</i> <sup>2</sup>            | 1.068                                                                                            |
| Final <i>R</i> indices [ <i>I</i> > 2σ( <i>I</i> )] | <i>R</i> <sub>1</sub> = 0.0750, <i>wR</i> <sub>2</sub> = 0.2030                                  |
| <i>R</i> indices (all data)                         | <i>R</i> <sub>1</sub> = 0.0812, <i>wR</i> <sub>2</sub> = 0.2082                                  |
| Largest diff. peak and hole/e.Å <sup>-3</sup>       | 1.18 and -0.70                                                                                   |

**Table S17.** Crystal data and refinement results for Tb-NTB-OBDC.

| <b>Identification code</b>                          | <b>Tb-NTB-OBDC</b>                                                                            |
|-----------------------------------------------------|-----------------------------------------------------------------------------------------------|
| Empirical formula                                   | C <sub>45</sub> H <sub>24</sub> N <sub>4</sub> O <sub>18</sub> F <sub>4</sub> Tb <sub>3</sub> |
| Formula weight                                      | 1461.47                                                                                       |
| Temperature/K                                       | 243.0                                                                                         |
| Wavelength/Å                                        | 1.54178                                                                                       |
| Crystal system                                      | Trigonal                                                                                      |
| Space group                                         | <i>P</i> -31 <i>m</i>                                                                         |
| Unit cell dimensions/Å                              | 18.0964(8)<br>15.2035(6)                                                                      |
| Volume/Å <sup>3</sup>                               | 4311.8(4)                                                                                     |
| Z                                                   | 2                                                                                             |
| Density (calculated)/Mg/m <sup>3</sup>              | 1.126                                                                                         |
| Absorption coefficient/mm <sup>-1</sup>             | 12.353                                                                                        |
| F (000)                                             | 1394.0                                                                                        |
| Crystal size/mm <sup>3</sup>                        | 0.12 × 0.12 × 0.06                                                                            |
| Theta range for data collection/°                   | 5.646 to 50.49                                                                                |
| Index ranges                                        | -17 ≤ h ≤ 18<br>-18 ≤ k ≤ 16<br>-15 ≤ l ≤ 15                                                  |
| Reflections collected                               | 12979                                                                                         |
| Independent reflections                             | 1618 [ <i>R</i> <sub>int</sub> = 0.1067]                                                      |
| Completeness to theta = 50.490°                     | 99.2%                                                                                         |
| Refinement method                                   | Full-matrix least-squares on <i>F</i> <sup>2</sup>                                            |
| Data / restraints / parameters                      | 1618 / 69 / 135                                                                               |
| Goodness-of-fit on <i>F</i> <sup>2</sup>            | 1.044                                                                                         |
| Final <i>R</i> indices [ <i>I</i> > 2σ( <i>I</i> )] | <i>R</i> <sub>1</sub> = 0.0714, <i>wR</i> <sub>2</sub> = 0.1855                               |
| <i>R</i> indices (all data)                         | <i>R</i> <sub>1</sub> = 0.0778, <i>wR</i> <sub>2</sub> = 0.1892                               |
| Largest diff. peak and hole/e.Å <sup>-3</sup>       | 1.27 and -1.03                                                                                |

---

## Section 8. References

1. S. Nandi, D. Chakraborty and R. Vaidhyanathan, *Chem. Commun.*, 2016, **52**, 7249-7252.
2. B. T. Nguyen, H. L. Nguyen, T. C. Nguyen, K. E. Cordova and H. Furukawa, *Chem. Mater.*, 2016, **28**, 6243-6249.
3. A. L. Myers, J. M. Prausnitz, *AIChE J.*, 1965, **11**, 121.
4. Y. S. Bae, K. L. Mulfort, H. Frost, P. Ryan, S. Punnathanam, L. J. Broadbelt, J. T. Hupp, R. Q. Snurr, *Langmuir*, 2008, **24**, 8592
5. B. Mu, F. Li, K. S. Walton, *Chem. Commun.*, 2009, 2493.
6. Bruker APEX2; Bruker AXS, Inc.: Madison, WI, 2010.
7. Bruker SAINT, Data Reduction Software; Bruker AXS, Inc.: Madison, WI, 2009.
8. G. M. Sheldrick, University of Gottingen: Gottingen, Germany, 1996.
9. G. M. Sheldrick, *Acta Crystallogr.*, 2015, **A71**, 3-8.
10. O. V. Dolomanov, L. J. Bourhis, R. J. Gildea, J. A. K. Howard, H. Puschmann, *J. Appl. Crystallogr.*, 2009, **42**, 339-341.
11. A. L. Spek, *Acta Crystallogr.*, 1990, **A46**, 194-201.
12. A. L. Spek, *J. Appl. Crystallogr.*, 2003, **36**, 7-13.
13. A. L. Spek, *Acta. Crystallogr.*, 2009, **D65**, 148-155.
